# Supplementary material for: Cosmogenic nuclide dating of two stacked ice masses: Ong Valley, Antarctica
Source: Copernicus journal article supplement (doi:10.5194/tc-2022-18), 2022-02-02
Supplement: Supplementary file 1 [file tc-2022-18-supplement-version2.zip]

## Sheet: Print table
Table SX. Step-degassing Ne isotope measurements for samples from Ong Valley "OD1" core site. Run on BGC "Ohio" system, October-November 2018. Note: "n.d" = not detected.
			Heating	Heating																Excess 21Ne				Excess 21Ne as	Percent of total	Total
		Aliquot	temperature	time	Total 20Ne released1			Total 21Ne released2			Total 22Ne released3			21Ne / 20Ne4			22Ne / 20Ne4			This heating step				% of 21Ne released	excess 21Ne	excess 21Ne
Sample name	Aliquot	weight (g)	(deg C)	(hr)	(109 atoms)			(106 atoms)			(106 atoms)			(10-3)			(10-3)			(106 atoms g-1)				in this heating step	released in this step	(106 atoms g-1)
1. Aliquots of CRONUS-A quartz standard run together with samples
CRONUS-A	201810a	0.1454	850	0.25	1.7992	+/-	0.0279	50.497	+/-	0.989	234.204	+/-	5.288	27.539	+/-	0.266	130.3	+/-	2.4	304.88	+/-	4.97		87.7865	98.3262	310.07	+/-	5.01363
			1100	0.25	0.1925	+/-	0.0102	1.346	+/-	0.096	20.312	+/-	3.727	6.87	+/-	0.582	105.6	+/-	19.6	5.19	+/-	0.66		56.0643	1.67382
	201810b	0.0968	850	0.25	1.2766	+/-	0.0211	33.747	+/-	0.7	168.92	+/-	4.863	25.945	+/-	0.341	132.4	+/-	3.4	303.86	+/-	5.49		87.1593	97.8458	310.55	+/-	5.59522
			1100	0.25	0.152	+/-	0.0094	1.116	+/-	0.105	16.919	+/-	3.791	7.21	+/-	0.785	111.4	+/-	25.3	6.69	+/-	1.08		58.028	2.15424
	201810c	0.0394	850	0.25	0.5476	+/-	0.0138	13.99	+/-	0.34	71.842	+/-	3.859	25.082	+/-	0.658	131.3	+/-	7.2	308.2	+/-	7.14		86.7983	91.473	336.93	+/-	7.79995
			1100	0.25	0.1236	+/-	0.0104	1.521	+/-	0.125	13.893	+/-	3.907	12.096	+/-	1.38	112.5	+/-	32.3	28.73	+/-	3.14		74.4222	8.52699
	201810d	0.1395	850	0.25	1.9761	+/-	0.0473	48.607	+/-	1.652	249.646	+/-	8.862	24.355	+/-	0.249	125.8	+/-	3.4	303.81	+/-	7.5		87.1922	97.7793	310.71	+/-	7.54361
			1100	0.25	0.132	+/-	0.0093	1.371	+/-	0.12	14.345	+/-	6.843	10.239	+/-	1.074	108.1	+/-	50.8	6.9	+/-	0.81		70.2079	2.22072
	201810e	0.122	850	0.25	1.6157	+/-	0.0223	42.714	+/-	0.619	210.214	+/-	5.606	25.994	+/-	0.396	129.9	+/-	3.6	305.79	+/-	3.98		87.3399	98.499	310.45	+/-	4.0783
			1100	0.25	0.1274	+/-	0.0097	0.952	+/-	0.106	14.229	+/-	5.375	7.41	+/-	0.986	111.8	+/-	41.9	4.66	+/-	0.89		59.7185	1.50105
	201810f	0.1597	850	0.25	2.0712	+/-	0.0363	55.802	+/-	0.942	269.924	+/-	6.266	26.529	+/-	0.27	129.4	+/-	2.8	306.42	+/-	5.31		87.6945	97.4463	314.45	+/-	5.35859
			1100	0.25	0.1585	+/-	0.0102	1.776	+/-	0.116	19.823	+/-	5.753	11.028	+/-	0.973	124.6	+/-	36.1	8.03	+/-	0.72		72.2067	2.55367
	201810g	0.147	850	0.25	2.2633	+/-	0.0345	52.057	+/-	0.85	282.419	+/-	6.438	22.846	+/-	0.22	124.5	+/-	2.3	306.91	+/-	5.26		86.6661	97.8886	313.53	+/-	5.3132
			1100	0.25	0.1591	+/-	0.0063	1.459	+/-	0.112	20.281	+/-	5.169	9.057	+/-	0.748	127.3	+/-	31.6	6.62	+/-	0.75		66.6991	2.11144
	201810h	0.1668	850	0.25	2.4144	+/-	0.0358	57.007	+/-	0.795	308.23	+/-	6.779	23.394	+/-	0.195	127.5	+/-	2.2	296.5	+/-	4.91		86.7546	96.4824	307.31	+/-	4.97315
			1100	0.25	0.2485	+/-	0.0072	2.565	+/-	0.134	28.305	+/-	5.346	10.197	+/-	0.569	113.8	+/-	20.9	10.81	+/-	0.79		70.2966	3.51762
2. Samples of unconsolidated ablation till overlying ice
17-OD1-PIT2-6-14	a	0.1525	850	0.25	0.6681	+/-	0.014	19.471	+/-	0.528	89.493	+/-	6.43	28.438	+/-	0.593	132.5	+/-	9.3	111.89	+/-	2.02		87.634	98.6076	113.47	+/-	2.10723
			1100	0.25	0.0739	+/-	0.0103	0.471	+/-	0.09	8.269	+/-	5.761	6.209	+/-	1.442	111	+/-	76.8	1.58	+/-	0.6		51.1571	1.39244
	b	0.1573	850	0.25	0.6982	+/-	0.0107	18.6	+/-	0.326	89.879	+/-	5.406	26.484	+/-	0.505	128	+/-	7.7	104.67	+/-	1.63		88.5193	100	104.67	+/-	1.63
			1100	0.25	0.0558	+/-	0.0093	0.105	+/-	0.084	7.857	+/-	5.426	1.85	+/-	1.496	139.1	+/-	96.2		n.d			0	0
17-OD1-PIT2-14-17	a	0.1427	850	0.25	0.6982	+/-	0.0128	17.487	+/-	0.461	91.039	+/-	6.293	24.43	+/-	0.42	129	+/-	8.7	105.31	+/-	1.77		85.9366	100	105.31	+/-	1.77
			1100	0.25	0.0525	+/-	0.0107	0.231	+/-	0.088	6.239	+/-	5.781	4.279	+/-	1.825	117.8	+/-	108.9		n.d			0	0
	b	0.1584	850	0.25	0.7468	+/-	0.0127	17.934	+/-	0.332	93.929	+/-	5.411	23.869	+/-	0.508	125.1	+/-	7.3	98.81	+/-	1.69		87.2728	100	98.81	+/-	1.69
			1100	0.25	0.0299	+/-	0.0095	0.157	+/-	0.08	3.822	+/-	5.402	5.205	+/-	3.066	126.3	+/-	178.1		n.d			0	0
17-OD1-PIT2-23-29	a	0.1542	850	0.25	0.8229	+/-	0.0144	19.589	+/-	0.514	105.215	+/-	6.363	23.15	+/-	0.399	126.3	+/-	7.4	108.01	+/-	1.95		85.0229	99.0281	109.07	+/-	2.04318
			1100	0.25	0.0611	+/-	0.0096	0.354	+/-	0.094	8.782	+/-	5.724	5.63	+/-	1.707	142.6	+/-	93.2	1.06	+/-	0.61		46.1729	0.971853
	b	0.1696	850	0.25	0.9222	+/-	0.0156	19.556	+/-	0.344	112.209	+/-	5.461	21.062	+/-	0.429	120.9	+/-	6	98.67	+/-	1.6		85.5719	97.8675	100.82	+/-	1.7088
			1100	0.25	0.1004	+/-	0.0101	0.669	+/-	0.1	12.713	+/-	5.399	6.578	+/-	1.161	125	+/-	53.1	2.15	+/-	0.6		54.5052	2.13251
17-OD1-PIT2-37-43	a	0.1527	850	0.25	0.4152	+/-	0.0104	15.148	+/-	0.433	61.595	+/-	6.121	35.474	+/-	0.961	146.5	+/-	14.4	88.62	+/-	1.9		89.3337	100	88.62	+/-	1.9
			1100	0.25	0.0282	+/-	0.0092	0.171	+/-	0.086	6.109	+/-	5.731	5.878	+/-	3.484	214.8	+/-	208		n.d			0	0
	b	0.1567	850	0.25	0.418	+/-	0.0107	15.976	+/-	0.277	61.523	+/-	5.608	37.951	+/-	1.052	146.2	+/-	13.4	93.56	+/-	1.39		91.768	98.8171	94.68	+/-	1.51003
			1100	0.25	0.042	+/-	0.0096	0.304	+/-	0.091	4.394	+/-	5.609	7.132	+/-	2.649	103.2	+/-	130.1	1.12	+/-	0.59		57.7316	1.18293
17-OD1-PIT2-43-50	a	0.1661	850	0.25	0.7418	+/-	0.014	11.324	+/-	0.34	85.362	+/-	6.181	14.84	+/-	0.351	113.6	+/-	8	53.19	+/-	1.4		78.0189	100	53.19	+/-	1.4
			1100	0.25	0.0783	+/-	0.0093	0.316	+/-	0.084	7.628	+/-	5.692	3.916	+/-	1.126	96.7	+/-	71.2		n.d			0	0
	b	0.1623	850	0.25	0.7228	+/-	0.0112	11.312	+/-	0.253	83.42	+/-	5.728	15.534	+/-	0.366	114.6	+/-	7.8	56.13	+/-	1.35		80.5331	98.2668	57.12	+/-	1.4654
			1100	0.25	0.0498	+/-	0.0104	0.312	+/-	0.089	7.274	+/-	5.391	6.162	+/-	2.151	143.7	+/-	107.7	0.99	+/-	0.57		51.499	1.73319
17-OD1-PIT2-56-62	a	0.1621	850	0.25	0.5319	+/-	0.0116	7.52	+/-	0.232	60.902	+/-	6.063	13.741	+/-	0.37	113.1	+/-	11	35.46	+/-	1.01		76.437	97.6053	36.33	+/-	1.15974
			1100	0.25	0.0506	+/-	0.0092	0.3	+/-	0.093	5.425	+/-	5.632	5.757	+/-	2.032	106.6	+/-	109.4	0.87	+/-	0.57		47.009	2.39472
	b	0.1581	850	0.25	0.4893	+/-	0.0115	6.557	+/-	0.205	55.616	+/-	5.57	13.297	+/-	0.484	112.8	+/-	11.3	32.07	+/-	1.21		77.326	97.685	32.83	+/-	1.32098
			1100	0.25	0.026	+/-	0.0098	0.201	+/-	0.082	6.385	+/-	5.278	7.578	+/-	4.135	241.3	+/-	213.2	0.76	+/-	0.53		59.7791	2.31496
3. Samples of sediment extracted from ice core
17-OD1-C1-5-36	a	0.1304	850	0.25	1.0575	+/-	0.0133	4.741	+/-	0.15	110.48	+/-	5.634	4.41	+/-	0.138	104.3	+/-	5.3	11.79	+/-	1.09		32.4281	94.2446	12.51	+/-	1.30633
			1100	0.25	0.0898	+/-	0.01	0.362	+/-	0.09	9.966	+/-	5.418	3.996	+/-	1.079	111.1	+/-	60	0.72	+/-	0.72		25.9359	5.7554
	b	0.1643	850	0.25	1.1086	+/-	0.0126	5.025	+/-	0.159	115.374	+/-	5.455	4.493	+/-	0.137	103.2	+/-	4.8	10.38	+/-	0.9		33.939	100	10.38	+/-	0.9
			1100	0.25	0.109	+/-	0.0096	0.383	+/-	0.096	12.99	+/-	5.459	3.443	+/-	0.901	117.1	+/-	48.9		n.d			0	0
17-OD1-C1-36-48	a	0.1521	850	0.25	1.6968	+/-	0.0175	6.498	+/-	0.165	178.528	+/-	5.84	3.768	+/-	0.09	105.1	+/-	3.4	9.04	+/-	0.99		21.1601	70.5148	12.82	+/-	1.16812
			1100	0.25	0.1651	+/-	0.0095	1.07	+/-	0.091	17.051	+/-	5.278	6.436	+/-	0.65	103.4	+/-	31.7	3.78	+/-	0.62		53.7325	29.4852
	b	0.1629	850	0.25	1.4186	+/-	0.0106	5.693	+/-	0.16	143.896	+/-	5.206	4.031	+/-	0.111	101.3	+/-	3.5	9.36	+/-	0.96		26.7828	80.4815	11.63	+/-	1.07782
			1100	0.25	0.1766	+/-	0.0055	0.904	+/-	0.081	17.622	+/-	5.556	5.046	+/-	0.468	99.5	+/-	30.5	2.27	+/-	0.49		40.9052	19.5185
17-OD1-C1-48-70	a	0.1615	850	0.25	1.3033	+/-	0.0141	5.808	+/-	0.206	137.022	+/-	5.774	4.386	+/-	0.151	105	+/-	4.4	11.54	+/-	1.2		32.0887	92.3939	12.49	+/-	1.36
			1100	0.25	0.1015	+/-	0.0101	0.457	+/-	0.1	11.304	+/-	5.446	4.467	+/-	1.061	111.5	+/-	53.4	0.95	+/-	0.64		33.5722	7.60608
	b	0.1458	850	0.25	1.3202	+/-	0.013	5.903	+/-	0.171	136.996	+/-	5.271	4.493	+/-	0.131	103.7	+/-	3.9	13.93	+/-	1.16		34.4061	84.4754	16.49	+/-	1.33462
			1100	0.25	0.1311	+/-	0.0054	0.771	+/-	0.097	14.975	+/-	5.063	5.805	+/-	0.755	114	+/-	37.5	2.56	+/-	0.66		48.4109	15.5246
	c	0.1347	850	0.25	1.1805	+/-	0.0143	4.991	+/-	0.154	122.337	+/-	4.97	4.079	+/-	0.117	100.4	+/-	4.1	9.84	+/-	1.01		26.5568	90.8587	10.83	+/-	1.15974
			1100	0.25	0.066	+/-	0.0051	0.339	+/-	0.077	5.908	+/-	4.63	4.98	+/-	1.196	87.3	+/-	68.7	0.99	+/-	0.57		39.3372	9.14127
17-OD1-C1-70-100	a	0.1433	850	0.25	0.991	+/-	0.0134	8.622	+/-	0.218	109.604	+/-	5.737	8.57	+/-	0.216	110.6	+/-	5.7	38.9	+/-	1.38		64.6529	97.6651	39.83	+/-	1.52542
			1100	0.25	0.0775	+/-	0.011	0.364	+/-	0.088	11.846	+/-	5.418	4.666	+/-	1.292	153.1	+/-	71.4	0.93	+/-	0.65		36.6124	2.33492
	b	0.1598	850	0.25	0.9952	+/-	0.0072	8.974	+/-	0.176	107.652	+/-	5.122	9.068	+/-	0.174	108.1	+/-	5	38.14	+/-	1.04		67.9159	95.589	39.9	+/-	1.14127
			1100	0.25	0.0892	+/-	0.0071	0.551	+/-	0.073	7.95	+/-	5.251	6.106	+/-	0.93	88.9	+/-	57.2	1.76	+/-	0.47		51.0432	4.41103
17-OD1-C1-107-125	a	0.1606	850	0.25	1.1739	+/-	0.0182	9.02	+/-	0.202	123.796	+/-	5.762	7.571	+/-	0.178	105.5	+/-	5	33.8	+/-	1.13		60.1805	100	33.8	+/-	1.13
			1100	0.25	0.1008	+/-	0.0106	0.272	+/-	0.087	11.239	+/-	5.555	2.68	+/-	0.888	111.6	+/-	54.9		n.d			0	0
	b	0.148	850	0.25	1.2793	+/-	0.0096	9.755	+/-	0.206	136.624	+/-	5.218	7.67	+/-	0.159	106.7	+/-	3.9	40.82	+/-	1.32		61.9309	92.6464	44.06	+/-	1.43781
			1100	0.25	0.1076	+/-	0.0054	0.804	+/-	0.085	13.455	+/-	5.137	7.397	+/-	0.85	124.7	+/-	46.4	3.24	+/-	0.57		59.6418	7.35361
	c	0.1625	850	0.25	1.1854	+/-	0.0129	9.378	+/-	0.227	129.706	+/-	4.998	7.626	+/-	0.157	106	+/-	4.1	34.13	+/-	1.15		59.1397	100	34.13	+/-	1.15
			1100	0.25	0.1268	+/-	0.0055	0.348	+/-	0.076	12.833	+/-	4.658	2.662	+/-	0.593	98.7	+/-	36.1		n.d			0	0
17-OD1-C1-125-145	a	0.164	850	0.25	1.1483	+/-	0.0135	8.133	+/-	0.196	121.065	+/-	5.996	6.981	+/-	0.161	105.5	+/-	5.2	28.23	+/-	1.07		56.9251	95.5977	29.53	+/-	1.22674
			1100	0.25	0.1117	+/-	0.0094	0.546	+/-	0.096	13.75	+/-	5.433	4.858	+/-	0.933	123.1	+/-	48.4	1.3	+/-	0.6		39.0476	4.4023
	b	0.1471	850	0.25	0.9372	+/-	0.0092	7.331	+/-	0.187	103.064	+/-	5.092	7.869	+/-	0.203	109.9	+/-	5.3	31.36	+/-	1.23		62.9253	94.4294	33.21	+/-	1.34332
			1100	0.25	0.0782	+/-	0.005	0.507	+/-	0.08	9.388	+/-	5.116	6.441	+/-	1.075	119.8	+/-	63.5	1.85	+/-	0.54		53.6755	5.57061
	c	0.1539	850	0.25	0.8998	+/-	0.0142	7.173	+/-	0.194	100.816	+/-	4.91	7.681	+/-	0.203	108.6	+/-	5.4	27.67	+/-	1.09		59.3673	97.4296	28.4	+/-	1.20768
			1100	0.25	0.0929	+/-	0.0058	0.399	+/-	0.081	10.229	+/-	4.813	4.159	+/-	0.885	107.3	+/-	50.9	0.73	+/-	0.52		28.1571	2.57042
17-OD1-C1-185-235	a	0.1532	850	0.25	0.7651	+/-	0.0119	4.341	+/-	0.146	79.453	+/-	5.599	5.594	+/-	0.191	103.9	+/-	7.3	13.19	+/-	0.91		46.5494	100	13.19	+/-	0.91
			1100	0.25	0.0579	+/-	0.0093	0.073	+/-	0.091	5.812	+/-	5.422	1.255	+/-	1.553	100.2	+/-	92.4		n.d			0	0
	b	0.1503	850	0.25	0.8097	+/-	0.0068	4.699	+/-	0.14	85.381	+/-	4.905	5.839	+/-	0.172	105.4	+/-	5.9	15.55	+/-	0.91		49.7375	90.6177	17.16	+/-	1.03354
			1100	0.25	0.0628	+/-	0.0057	0.43	+/-	0.073	5.46	+/-	5.167	6.803	+/-	1.294	86.7	+/-	79.6	1.61	+/-	0.49		56.2751	9.38228
	c	0.1457	850	0.25	0.7381	+/-	0.0098	4.024	+/-	0.148	76.05	+/-	4.903	5.25	+/-	0.186	99.8	+/-	6.5	11.64	+/-	0.93		42.1458	100	11.64	+/-	0.93
17-OD1-C1-235-310	a	0.1449	850	0.25	0.562	+/-	0.0134	2.531	+/-	0.125	58.975	+/-	5.636	4.442	+/-	0.234	105	+/-	10	5.77	+/-	0.86		33.0333	100	5.77	+/-	0.86
			1100	0.25	0.0397	+/-	0.011	0.011	+/-	0.085	5.695	+/-	5.447	0.284	+/-	2.103	143.1	+/-	138.7		n.d			0	0
	b	0.1564	850	0.25	0.591	+/-	0.008	2.842	+/-	0.125	59.193	+/-	4.856	4.838	+/-	0.216	100.2	+/-	8	7.12	+/-	0.8		39.1825	88.228	8.07	+/-	0.938136
			1100	0.25	0.0696	+/-	0.0053	0.356	+/-	0.077	6.833	+/-	5.187	5.085	+/-	1.15	97.9	+/-	72.2	0.95	+/-	0.49		41.736	11.772
	c	0.1654	850	0.25	0.6767	+/-	0.0094	3	+/-	0.141	68.092	+/-	4.869	4.279	+/-	0.198	97.7	+/-	7.1	5.41	+/-	0.8		29.8271	100	5.41	+/-	0.8
			1100	0.25	0.0585	+/-	0.0046	0.26	+/-	0.083	5.885	+/-	4.772	4.277	+/-	1.402	97.9	+/-	79.7		n.d			0	0
17-OD1-C1-310-350	a	0.1543	850	0.25	0.9883	+/-	0.014	3.819	+/-	0.162	101.919	+/-	5.681	3.813	+/-	0.16	103.2	+/-	5.7	5.49	+/-	1.01		22.1814	100	5.49	+/-	1.01
			1100	0.25	0.0973	+/-	0.0099	0.325	+/-	0.085	8.888	+/-	5.371	3.32	+/-	0.918	91.1	+/-	54.4		n.d			0	0
	b	0.1435	850	0.25	1.2389	+/-	0.0091	5.44	+/-	0.142	127.638	+/-	4.967	4.418	+/-	0.113	103	+/-	3.9	12.62	+/-	0.96		33.2899	79.8734	15.8	+/-	1.1114
			1100	0.25	0.126	+/-	0.0051	0.831	+/-	0.08	14.211	+/-	4.991	6.574	+/-	0.673	112.6	+/-	38.5	3.18	+/-	0.56		54.9134	20.1266
	c	0.1547	850	0.25	0.9366	+/-	0.009	3.752	+/-	0.146	95.204	+/-	4.826	3.862	+/-	0.141	98.7	+/-	5	5.48	+/-	0.85		22.5948	86.9841	6.3	+/-	0.976166
			1100	0.25	0.0731	+/-	0.0085	0.356	+/-	0.073	6.169	+/-	4.885	4.688	+/-	1.094	82.1	+/-	65.7	0.82	+/-	0.48		35.6331	13.0159
17-OD1-C1-500-582	a	0.1461	850	0.25	0.5034	+/-	0.0109	4.538	+/-	0.151	55.092	+/-	5.595	8.934	+/-	0.337	109.6	+/-	11	20.64	+/-	1.02		66.4501	100	20.64	+/-	1.02
			1100	0.25	0.029	+/-	0.0101	0.079	+/-	0.083	2.797	+/-	5.661	2.705	+/-	2.961	96.1	+/-	192.3		n.d			0	0
	b	0.1475	850	0.25	0.546	+/-	0.0097	4.631	+/-	0.148	59.844	+/-	5.085	8.398	+/-	0.26	109.4	+/-	8.9	20.18	+/-	0.96		64.2745	92.9954	21.7	+/-	1.10145
			1100	0.25	0.0287	+/-	0.0054	0.313	+/-	0.08	4.008	+/-	5.314	10.754	+/-	3.353	139.3	+/-	180	1.52	+/-	0.54		71.6294	7.00461
17-OD1-C1-582-649	a	0.1444	850	0.25	0.5528	+/-	0.011	7.01	+/-	0.176	61.845	+/-	5.437	12.57	+/-	0.375	112	+/-	9.8	36.88	+/-	1.19		75.9696	100	36.88	+/-	1.19
			1100	0.25	0.0447	+/-	0.0097	0.206	+/-	0.088	5.177	+/-	5.608	4.587	+/-	2.165	115.4	+/-	124.2		n.d			0	0
	b	0.1648	850	0.25	0.5099	+/-	0.009	5.426	+/-	0.16	54.577	+/-	5.233	10.538	+/-	0.299	106.9	+/-	9.9	23.5	+/-	0.93		71.3749	96.2326	24.42	+/-	1.04657
			1100	0.25	0.0527	+/-	0.0056	0.312	+/-	0.08	5.348	+/-	5.357	5.847	+/-	1.599	101.4	+/-	98.6	0.92	+/-	0.48		48.5949	3.7674
	c	0.1569	850	0.25	0.4441	+/-	0.0064	5.216	+/-	0.187	48.543	+/-	4.671	11.317	+/-	0.397	106.2	+/-	10.3	23.72	+/-	1.07		71.351	100	23.72	+/-	1.07
			1100	0.25	0.032	+/-	0.0062	0.168	+/-	0.079	3.539	+/-	4.816	5.038	+/-	2.558	107.5	+/-	147.8		n.d			0	0
17-OD1-C1-781-819	a	0.1347	850	0.25	0.3884	+/-	0.0101	7.891	+/-	0.204	47.411	+/-	5.417	20.15	+/-	0.696	122.2	+/-	13.9	49.68	+/-	1.48		84.8042	100	49.68	+/-	1.48
			1100	0.25	0.0175	+/-	0.0095	0.064	+/-	0.087	2.735	+/-	5.59	3.657	+/-	5.237	155.8	+/-	321.1		n.d			0	0
	b	0.1369	850	0.25	0.4058	+/-	0.0087	8.767	+/-	0.179	51.172	+/-	5.196	21.404	+/-	0.487	125.9	+/-	12.4	54.8	+/-	1.31		85.5723	98.6854	55.53	+/-	1.41693
			1100	0.25	0.031	+/-	0.0076	0.194	+/-	0.072	4.827	+/-	5.325	6.186	+/-	2.707	155.7	+/-	169.8	0.73	+/-	0.54		51.5139	1.3146
17-OD1-C1-819-879	a	0.1512	850	0.25	0.3812	+/-	0.0112	10.561	+/-	0.321	53.103	+/-	5.905	26.919	+/-	0.881	137.6	+/-	15.2	60.55	+/-	1.5		86.6884	98.2157	61.65	+/-	1.61186
			1100	0.25	0.0334	+/-	0.0089	0.272	+/-	0.089	3.729	+/-	5.756	7.906	+/-	3.297	110.9	+/-	169.4	1.1	+/-	0.59		61.1471	1.78427
	b	0.1365	850	0.25	0.3915	+/-	0.0107	10.238	+/-	0.219	48.944	+/-	5.361	25.941	+/-	0.847	125.1	+/-	13.7	66.07	+/-	1.56		88.089	97.9686	67.44	+/-	1.70176
			1100	0.25	0.0254	+/-	0.0098	0.264	+/-	0.09	4.732	+/-	5.572	10.321	+/-	5.238	185.7	+/-	224.2	1.37	+/-	0.68		70.8352	2.03144
17-OD1-C1-879-944	a	0.1472	850	0.25	0.4143	+/-	0.0107	11.138	+/-	0.351	53.907	+/-	6.004	26.117	+/-	0.806	128.6	+/-	14.1	65.33	+/-	1.74		86.3402	100	65.33	+/-	1.74
			1100	0.25	0.0428	+/-	0.0095	0.164	+/-	0.089	5.471	+/-	5.582	3.726	+/-	2.157	126.9	+/-	129.1		n.d			0	0
	b	0.1548	850	0.25	0.3494	+/-	0.0097	11.547	+/-	0.272	50.374	+/-	5.37	32.781	+/-	1.089	143	+/-	15.3	67.47	+/-	1.52		90.4508	98.181	68.72	+/-	1.6269
			1100	0.25	0.0351	+/-	0.01	0.303	+/-	0.087	4.239	+/-	5.373	8.453	+/-	3.376	118.7	+/-	150	1.25	+/-	0.58		63.8614	1.81898
1 Computed by comparison to 20Ne signal in air standards. 1-sigma uncertainty includes measurement uncertainty of 20Ne signal in this analysis and the reproducibility of the air standards
2 Computed by comparison to 21Ne signal in air standards. 1-sigma uncertainty includes measurement uncertainty of 21Ne signal in this analysis and the reproducibility of the air standards
3 Computed by comparison to 22Ne signal in air standards. 1-sigma uncertainty includes measurement uncertainty of 22Ne signal in this analysis and the reproducibility of the air standards
4 Isotope ratio measured internally during each analysis and corrected for mass discrimination based on an air standard. Does not involve normalization to the Ne isotope signals in the standards, so the ratio computed from absolute Ne isotope amounts in previous columns may differ within uncertainty.

## Sheet: summary
sample_name	aliquot	aliquot_wt_g	analysis_date	N21xs_atoms_g	delN21xs_atoms_g	system
1. Samples of unconsolidated sediment from ablation till
17-OD1-PIT2-6-14	a	0.1525	2018-10-01	113470000	2.10723e+06	BGC-Ohio			Note: mean and SD of concomitant CRONUS-A is				314.3	+/-	9.4	Matoms/g
17-OD1-PIT2-6-14	b	0.1573	2018-10-01	104670000	1630000	BGC-Ohio
17-OD1-PIT2-14-17	a	0.1427	2018-10-01	105310000	1770000	BGC-Ohio
17-OD1-PIT2-14-17	b	0.1584	2018-10-01	98810000	1690000	BGC-Ohio
17-OD1-PIT2-23-29	a	0.1542	2018-10-01	109070000	2.04318e+06	BGC-Ohio
17-OD1-PIT2-23-29	b	0.1696	2018-10-01	100820000	1.7088e+06	BGC-Ohio
17-OD1-PIT2-37-43	a	0.1527	2018-10-01	88620000	1900000	BGC-Ohio
17-OD1-PIT2-37-43	b	0.1567	2018-10-01	94680000	1.51003e+06	BGC-Ohio
17-OD1-PIT2-43-50	a	0.1661	2018-10-01	53190000	1400000	BGC-Ohio
17-OD1-PIT2-43-50	b	0.1623	2018-10-01	5.712e+07	1.4654e+06	BGC-Ohio
17-OD1-PIT2-56-62	a	0.1621	2018-10-01	36330000	1.15974e+06	BGC-Ohio
17-OD1-PIT2-56-62	b	0.1581	2018-10-01	32830000	1.32098e+06	BGC-Ohio
2. Sediment samples from ice core
17-OD1-C1-5-36	a	0.1304	2018-10-01	12510000	1.30633e+06	BGC-Ohio
17-OD1-C1-5-36	b	0.1643	2018-10-01	10380000	900000	BGC-Ohio
17-OD1-C1-36-48	a	0.1521	2018-10-01	1.282e+07	1.16812e+06	BGC-Ohio
17-OD1-C1-36-48	b	0.1629	2018-10-01	1.163e+07	1.07782e+06	BGC-Ohio
17-OD1-C1-48-70	a	0.1615	2018-10-01	1.249e+07	1.36e+06	BGC-Ohio
17-OD1-C1-48-70	b	0.1458	2018-10-01	1.649e+07	1.33462e+06	BGC-Ohio
17-OD1-C1-48-70	c	0.1347	2018-10-01	10830000	1.15974e+06	BGC-Ohio
17-OD1-C1-70-100	a	0.1433	2018-10-01	39830000	1.52542e+06	BGC-Ohio
17-OD1-C1-70-100	b	0.1598	2018-10-01	39900000	1.14127e+06	BGC-Ohio
17-OD1-C1-107-125	a	0.1606	2018-10-01	33800000	1130000	BGC-Ohio
17-OD1-C1-107-125	b	0.148	2018-10-01	44060000	1.43781e+06	BGC-Ohio
17-OD1-C1-107-125	c	0.1625	2018-10-01	34130000	1150000	BGC-Ohio
17-OD1-C1-125-145	a	0.164	2018-10-01	29530000	1.22674e+06	BGC-Ohio
17-OD1-C1-125-145	b	0.1471	2018-10-01	33210000	1.34332e+06	BGC-Ohio
17-OD1-C1-125-145	c	0.1539	2018-10-01	2.84e+07	1.20768e+06	BGC-Ohio
17-OD1-C1-185-235	a	0.1532	2018-10-01	13190000	910000	BGC-Ohio
17-OD1-C1-185-235	b	0.1503	2018-10-01	17160000	1.03354e+06	BGC-Ohio
17-OD1-C1-185-235	c	0.1457	2018-10-01	11640000	930000	BGC-Ohio
17-OD1-C1-235-310	a	0.1449	2018-10-01	5770000	860000	BGC-Ohio
17-OD1-C1-235-310	b	0.1564	2018-10-01	8070000	938136	BGC-Ohio
17-OD1-C1-235-310	c	0.1654	2018-10-01	5410000	800000	BGC-Ohio
17-OD1-C1-310-350	a	0.1543	2018-10-01	5490000	1010000	BGC-Ohio
17-OD1-C1-310-350	b	0.1435	2018-10-01	1.58e+07	1.1114e+06	BGC-Ohio
17-OD1-C1-310-350	c	0.1547	2018-10-01	6.3e+06	976166	BGC-Ohio
17-OD1-C1-500-582	a	0.1461	2018-10-01	20640000	1020000	BGC-Ohio
17-OD1-C1-500-582	b	0.1475	2018-10-01	21700000	1.10145e+06	BGC-Ohio
17-OD1-C1-582-649	a	0.1444	2018-10-01	36880000	1190000	BGC-Ohio
17-OD1-C1-582-649	b	0.1648	2018-10-01	24420000	1.04657e+06	BGC-Ohio
17-OD1-C1-582-649	c	0.1569	2018-10-01	23720000	1070000	BGC-Ohio
17-OD1-C1-781-819	a	0.1347	2018-10-01	49680000	1480000	BGC-Ohio
17-OD1-C1-781-819	b	0.1369	2018-10-01	5.553e+07	1.41693e+06	BGC-Ohio
17-OD1-C1-819-879	a	0.1512	2018-10-01	61650000	1.61186e+06	BGC-Ohio
17-OD1-C1-819-879	b	0.1365	2018-10-01	67440000	1.70176e+06	BGC-Ohio
17-OD1-C1-879-944	a	0.1472	2018-10-01	65330000	1740000	BGC-Ohio
17-OD1-C1-879-944	b	0.1548	2018-10-01	68720000	1.6269e+06	BGC-Ohio

## Sheet: ratio summary
Sample	temp	N20	delN20	N21	delN21	N22	delN22	r2120	delr2120	r2220	delr2220
Unconsolidated ablation till
17-OD1-PIT2-6-14	850	668100000	14000000	19471000	528000	89493000	6430000	0.028438	0.000593	0.1325	0.0093
17-OD1-PIT2-6-14	1100	73900000	10300000	471000	90000	8269000	5761000	0.006209	0.001442	0.111	0.0768
17-OD1-PIT2-6-14	850	698200000	10700000	18600000	326000	89879000	5406000	0.026484	0.000505	0.128	0.0077
17-OD1-PIT2-6-14	1100	55800000	9300000	105000	84000	7857000	5426000	0.00185	0.001496	0.1391	0.0962
17-OD1-PIT2-14-17	850	698200000	12800000	17487000	461000	91039000	6293000	0.02443	0.00042	0.129	0.0087
17-OD1-PIT2-14-17	1100	52500000	10700000	231000	88000	6239000	5781000	0.004279	0.001825	0.1178	0.1089
17-OD1-PIT2-14-17	850	746800000	12700000	17934000	332000	93929000	5411000	0.023869	0.000508	0.1251	0.0073
17-OD1-PIT2-14-17	1100	29900000	9500000	157000	80000	3822000	5402000	0.005205	0.003066	0.1263	0.1781
17-OD1-PIT2-23-29	850	822900000	14400000	19589000	514000	105215000	6363000	0.02315	0.000399	0.1263	0.0074
17-OD1-PIT2-23-29	1100	61100000	9600000	354000	94000	8782000	5724000	0.00563	0.001707	0.1426	0.0932
17-OD1-PIT2-23-29	850	922200000	15600000	19556000	344000	112209000	5461000	0.021062	0.000429	0.1209	0.006
17-OD1-PIT2-23-29	1100	100400000	10100000	669000	100000	12713000	5399000	0.006578	0.001161	0.125	0.0531
17-OD1-PIT2-37-43	850	415200000	10400000	15148000	433000	61595000	6121000	0.035474	0.000961	0.1465	0.0144
17-OD1-PIT2-37-43	1100	28200000	9200000	171000	86000	6109000	5731000	0.005878	0.003484	0.2148	0.208
17-OD1-PIT2-37-43	850	418000000	10700000	15976000	277000	61523000	5608000	0.037951	0.001052	0.1462	0.0134
17-OD1-PIT2-37-43	1100	42000000	9600000	304000	91000	4394000	5609000	0.007132	0.002649	0.1032	0.1301
17-OD1-PIT2-43-50	850	741800000	14000000	11324000	340000	85362000	6181000	0.01484	0.000351	0.1136	0.008
17-OD1-PIT2-43-50	1100	78300000	9300000	316000	84000	7628000	5692000	0.003916	0.001126	0.0967	0.0712
17-OD1-PIT2-43-50	850	722800000	11200000	11312000	253000	83420000	5728000	0.015534	0.000366	0.1146	0.0078
17-OD1-PIT2-43-50	1100	49800000	10400000	312000	89000	7274000	5391000	0.006162	0.002151	0.1437	0.1077
17-OD1-PIT2-56-62	850	5.319e+08	11600000	7520000	232000	60902000	6063000	0.013741	0.00037	0.1131	0.011
17-OD1-PIT2-56-62	1100	50600000	9200000	300000	93000	5425000	5632000	0.005757	0.002032	0.1066	0.1094
17-OD1-PIT2-56-62	850	489300000	11500000	6557000	205000	55616000	5570000	0.013297	0.000484	0.1128	0.0113
17-OD1-PIT2-56-62	1100	26000000	9800000	201000	82000	6385000	5278000	0.007578	0.004135	0.2413	0.2132
Sediment in ice cores
17-OD1-C1-5-36	850	1.0575e+09	13300000	4741000	150000	110480000	5634000	0.00441	0.000138	0.1043	0.0053
17-OD1-C1-5-36	1100	89800000	10000000	362000	90000	9966000	5418000	0.003996	0.001079	0.1111	0.06
17-OD1-C1-5-36	850	1108600000	12600000	5025000	159000	115374000	5455000	0.004493	0.000137	0.1032	0.0048
17-OD1-C1-5-36	1100	109000000	9600000	383000	96000	12990000	5459000	0.003443	0.000901	0.1171	0.0489
17-OD1-C1-36-48	850	1696800000	17500000	6498000	165000	178528000	5840000	0.003768	9e-05	0.1051	0.0034
17-OD1-C1-36-48	1100	165100000	9500000	1070000	91000	17051000	5278000	0.006436	0.00065	0.1034	0.0317
17-OD1-C1-36-48	850	1418600000	10600000	5693000	160000	143896000	5206000	0.004031	0.000111	0.1013	0.0035
17-OD1-C1-36-48	1100	176600000	5500000	904000	81000	17622000	5556000	0.005046	0.000468	0.0995	0.0305
17-OD1-C1-48-70	850	1303300000	14100000	5808000	206000	137022000	5774000	0.004386	0.000151	0.105	0.0044
17-OD1-C1-48-70	1100	101500000	10100000	457000	100000	11304000	5446000	0.004467	0.001061	0.1115	0.0534
17-OD1-C1-48-70	850	1320200000	13000000	5903000	171000	136996000	5271000	0.004493	0.000131	0.1037	0.0039
17-OD1-C1-48-70	1100	131100000	5400000	771000	97000	14975000	5063000	0.005805	0.000755	0.114	0.0375
17-OD1-C1-48-70	850	1180500000	14300000	4991000	154000	122337000	4970000	0.004079	0.000117	0.1004	0.0041
17-OD1-C1-48-70	1100	66000000	5100000	339000	77000	5908000	4630000	0.00498	0.001196	0.0873	0.0687
17-OD1-C1-70-100	850	991000000	13400000	8622000	218000	109604000	5737000	0.00857	0.000216	0.1106	0.0057
17-OD1-C1-70-100	1100	77500000	11000000	364000	88000	11846000	5418000	0.004666	0.001292	0.1531	0.0714
17-OD1-C1-70-100	850	995200000	7200000	8974000	176000	107652000	5122000	0.009068	0.000174	0.1081	0.005
17-OD1-C1-70-100	1100	89200000	7100000	551000	73000	7950000	5251000	0.006106	0.00093	0.0889	0.0572
17-OD1-C1-107-125	850	1173900000	18200000	9020000	202000	123796000	5762000	0.007571	0.000178	0.1055	0.005
17-OD1-C1-107-125	1100	100800000	10600000	272000	87000	11239000	5555000	0.00268	0.000888	0.1116	0.0549
17-OD1-C1-107-125	850	1279300000	9600000	9755000	206000	136624000	5218000	0.00767	0.000159	0.1067	0.0039
17-OD1-C1-107-125	1100	107600000	5400000	804000	85000	13455000	5137000	0.007397	0.00085	0.1247	0.0464
17-OD1-C1-107-125	850	1185400000	12900000	9378000	227000	1.29706e+08	4998000	0.007626	0.000157	0.106	0.0041
17-OD1-C1-107-125	1100	126800000	5500000	348000	76000	12833000	4658000	0.002662	0.000593	0.0987	0.0361
17-OD1-C1-125-145	850	1148300000	13500000	8.133e+06	196000	121065000	5996000	0.006981	0.000161	0.1055	0.0052
17-OD1-C1-125-145	1100	111700000	9400000	546000	96000	13750000	5433000	0.004858	0.000933	0.1231	0.0484
17-OD1-C1-125-145	850	937200000	9200000	7331000	187000	103064000	5092000	0.007869	0.000203	0.1099	0.0053
17-OD1-C1-125-145	1100	78200000	5000000	507000	80000	9388000	5116000	0.006441	0.001075	0.1198	0.0635
17-OD1-C1-125-145	850	899800000	14200000	7173000	194000	100816000	4910000	0.007681	0.000203	0.1086	0.0054
17-OD1-C1-125-145	1100	92900000	5800000	399000	81000	10229000	4813000	0.004159	0.000885	0.1073	0.0509
17-OD1-C1-185-235	850	765100000	11900000	4341000	146000	79453000	5599000	0.005594	0.000191	0.1039	0.0073
17-OD1-C1-185-235	1100	57900000	9300000	73000	91000	5812000	5422000	0.001255	0.001553	0.1002	0.0924
17-OD1-C1-185-235	850	809700000	6800000	4699000	140000	85381000	4905000	0.005839	0.000172	0.1054	0.0059
17-OD1-C1-185-235	1100	6.28e+07	5700000	430000	73000	5460000	5167000	0.006803	0.001294	0.0867	0.0796
17-OD1-C1-185-235	850	738100000	9800000	4024000	148000	76050000	4903000	0.00525	0.000186	0.0998	0.0065
17-OD1-C1-235-310	850	562000000	13400000	2531000	125000	58975000	5636000	0.004442	0.000234	0.105	0.01
17-OD1-C1-235-310	1100	39700000	11000000	11000	85000	5695000	5447000	0.000284	0.002103	0.1431	0.1387
17-OD1-C1-235-310	850	591000000	8000000	2842000	125000	59193000	4856000	0.004838	0.000216	0.1002	0.008
17-OD1-C1-235-310	1100	69600000	5300000	356000	77000	6833000	5187000	0.005085	0.00115	0.0979	0.0722
17-OD1-C1-235-310	850	676700000	9400000	3000000	141000	68092000	4869000	0.004279	0.000198	0.0977	0.0071
17-OD1-C1-235-310	1100	58500000	4600000	260000	83000	5885000	4772000	0.004277	0.001402	0.0979	0.0797
17-OD1-C1-310-350	850	988300000	14000000	3819000	162000	101919000	5681000	0.003813	0.00016	0.1032	0.0057
17-OD1-C1-310-350	1100	97300000	9900000	325000	85000	8888000	5371000	0.00332	0.000918	0.0911	0.0544
17-OD1-C1-310-350	850	1238900000	9100000	5440000	142000	127638000	4967000	0.004418	0.000113	0.103	0.0039
17-OD1-C1-310-350	1100	126000000	5100000	831000	80000	14211000	4991000	0.006574	0.000673	0.1126	0.0385
17-OD1-C1-310-350	850	936600000	9000000	3752000	146000	95204000	4826000	0.003862	0.000141	0.0987	0.005
17-OD1-C1-310-350	1100	73100000	8500000	356000	73000	6169000	4885000	0.004688	0.001094	0.0821	0.0657
17-OD1-C1-500-582	850	5.034e+08	10900000	4538000	151000	55092000	5595000	0.008934	0.000337	0.1096	0.011
17-OD1-C1-500-582	1100	29000000	10100000	79000	83000	2797000	5661000	0.002705	0.002961	0.0961	0.1923
17-OD1-C1-500-582	850	546000000	9700000	4631000	148000	59844000	5085000	0.008398	0.00026	0.1094	0.0089
17-OD1-C1-500-582	1100	28700000	5400000	313000	80000	4008000	5314000	0.010754	0.003353	0.1393	0.18
17-OD1-C1-582-649	850	552800000	11000000	7010000	176000	61845000	5437000	0.01257	0.000375	0.112	0.0098
17-OD1-C1-582-649	1100	44700000	9700000	206000	88000	5177000	5608000	0.004587	0.002165	0.1154	0.1242
17-OD1-C1-582-649	850	509900000	9000000	5426000	160000	54577000	5233000	0.010538	0.000299	0.1069	0.0099
17-OD1-C1-582-649	1100	52700000	5600000	312000	80000	5348000	5357000	0.005847	0.001599	0.1014	0.0986
17-OD1-C1-582-649	850	444100000	6400000	5216000	187000	48543000	4671000	0.011317	0.000397	0.1062	0.0103
17-OD1-C1-582-649	1100	32000000	6200000	168000	79000	3539000	4816000	0.005038	0.002558	0.1075	0.1478
17-OD1-C1-781-819	850	388400000	10100000	7891000	204000	47411000	5417000	0.02015	0.000696	0.1222	0.0139
17-OD1-C1-781-819	1100	17500000	9500000	64000	87000	2735000	5590000	0.003657	0.005237	0.1558	0.3211
17-OD1-C1-781-819	850	405800000	8700000	8767000	179000	51172000	5196000	0.021404	0.000487	0.1259	0.0124
17-OD1-C1-781-819	1100	31000000	7600000	194000	72000	4827000	5325000	0.006186	0.002707	0.1557	0.1698
17-OD1-C1-819-879	850	381200000	11200000	10561000	321000	53103000	5905000	0.026919	0.000881	0.1376	0.0152
17-OD1-C1-819-879	1100	33400000	8900000	272000	89000	3729000	5756000	0.007906	0.003297	0.1109	0.1694
17-OD1-C1-819-879	850	391500000	10700000	10238000	219000	48944000	5361000	0.025941	0.000847	0.1251	0.0137
17-OD1-C1-819-879	1100	25400000	9800000	264000	90000	4732000	5572000	0.010321	0.005238	0.1857	0.2242
17-OD1-C1-879-944	850	414300000	10700000	11138000	351000	53907000	6004000	0.026117	0.000806	0.1286	0.0141
17-OD1-C1-879-944	1100	42800000	9500000	164000	89000	5471000	5582000	0.003726	0.002157	0.1269	0.1291
17-OD1-C1-879-944	850	349400000	9700000	11547000	272000	50374000	5370000	0.032781	0.001089	0.143	0.0153
17-OD1-C1-879-944	1100	35100000	10000000	303000	87000	4239000	5373000	0.008453	0.003376	0.1187	0.15
