# Supplementary material for: Cosmogenic nuclide dating of two stacked ice masses: Ong Valley, Antarctica
Source: Copernicus journal article supplement (doi:10.5194/tc-2022-18), 2022-02-02
Supplement: Supplementary file 2 [file Table_S_OV_OD1_Al26_UVM.xlsx]

## Sheet: Blanks
Blank Name	UVM Batch Number	Cathode Number	Al Analysis Date	Added Al carrier (μg)	From AMS: 26Al/27Al Ratio	From AMS: 26Al/27Al Ratio Uncertainty
BLK	645	153405	2019-01-20	1510.8	7.67849e-15	1.3472e-15
BLK	646	153418	2019-01-20	1509.9	1.08624e-15	5.88198e-16
			AVERAGE	1510.35	4.38237e-15
			STDEV	0.636396	4.66143e-15
You had two blanks with your samples, so I see no reason not to average them. There's a bit of spread, and the first one is higher than we generally see, but that's not necessarily surprising given your sample ratios. The blank correction should be pretty trivial since some of your samples are four orders of magnitude higher! I'm happy to discuss other options though.

## Sheet: 26Al Calculations (2)
CONSTANTS
Atomic Mass of Al (g/mol):			26.9815
Avogadro's Number (atoms/mol):			6.022e+23
			SAMPLE PREPARATION DATA			CALCULATIONS TO DETERMINE CONCENTRATION					CALCULATIONS TO DETERMINE UNCERTAINTY
Sample Name	UVM Batch Number	Al Analysis Date	Quartz Mass (g)	Total 27Al Quantified by ICP-OES (μg)	Calculate: Total 27Al Atoms	From AMS: Uncorrected 26Al/27Al Ratio	From "Blanks" Sheet: Background 26Al/27Al Ratio	Calculate: Background-Corrected 26Al/27Al Ratio	Calculate: 26Al Atoms	Calculate: 26Al Atoms/g	From AMS: Uncorrected 26Al/27Al Ratio Uncertainty	From "Blanks" Sheet: Background 26Al/27Al Ratio Uncertainty	Calculate: Background-Corrected 26Al/27Al Ratio Uncertainty	Calculate: Uncertainty 26Al Atoms	Calculate: Uncertainty 26Al Atoms/g
Pit2-6-14	645	2019-01-20	20.6733	1809.14	4.03782e+19	3.47413e-11	4.38237e-15	3.47369e-11	1.40261e+09	6.78466e+07	6.19006e-13	4.66143e-15	6.19023e-13	2.4995e+07	1.20905e+06
Pit2-14-17	645	2019-01-20	21.9411	1924.91	4.29621e+19	3.43884e-11	4.38237e-15	3.4384e-11	1.47721e+09	6.73261e+07	7.18457e-13	4.66143e-15	7.18472e-13	3.08671e+07	1.40682e+06
Pit2-23-29	645	2019-01-20	21.8446	1724.01	3.84781e+19	3.6019e-11	4.38237e-15	3.60146e-11	1.38578e+09	6.34379e+07	7.57177e-13	4.66143e-15	7.57191e-13	2.91353e+07	1.33375e+06
Pit2-37-43	645	2019-01-20	12.7551	1763.6	3.93618e+19	1.88619e-11	4.38237e-15	1.88575e-11	7.42265e+08	5.81936e+07	3.85653e-13	4.66143e-15	3.85681e-13	1.51811e+07	1.1902e+06
Pit2-43-50	645	2019-01-20	18.8236	1473.21	3.28806e+19	2.03801e-11	4.38237e-15	2.03757e-11	6.69965e+08	3.55918e+07	4.21319e-13	4.66143e-15	4.21345e-13	1.38541e+07	735994
Pit2-56-62	645	2019-01-20	12.6866	1634.38	3.64777e+19	8.11814e-12	4.38237e-15	8.11376e-12	2.95971e+08	2.33294e+07	1.84164e-13	4.66143e-15	1.84223e-13	6.72003e+06	529695
C1-5-36	645	2019-01-20	1.8134	1586.67	3.54128e+19	2.34345e-13	4.38237e-15	2.29963e-13	8.14362e+06	4.4908e+06	9.6541e-15	4.66143e-15	1.07206e-14	379645	209356
C1-36-48	645	2019-01-20	2.2931	1616.68	3.60826e+19	2.25673e-13	4.38237e-15	2.21291e-13	7.98475e+06	3.48208e+06	8.08234e-15	4.66143e-15	9.33022e-15	336659	146814
C1-48-70	645	2019-01-20	2.5156	1683.24	3.75683e+19	2.05693e-13	4.38237e-15	2.01311e-13	7.56289e+06	3.0064e+06	8.72104e-15	4.66143e-15	9.88865e-15	371499	147678
C1-70-100	645	2019-01-20	1.5451	1593.69	3.55696e+19	1.90802e-13	4.38237e-15	1.8642e-13	6.63087e+06	4.29155e+06	8.11448e-15	4.66143e-15	9.35808e-15	332863	215432
C1-107-125	646	2019-01-20	11.1057	2116.47	4.72375e+19	7.83931e-13	4.38237e-15	7.79549e-13	3.68239e+07	3.31577e+06	1.97227e-14	4.66143e-15	2.02661e-14	957318	86200.6
C1-125-145	646	2019-01-20	5.7661	1855.78	4.14192e+19	3.94607e-13	4.38237e-15	3.90225e-13	1.61628e+07	2.80307e+06	1.3555e-14	4.66143e-15	1.43341e-14	593707	102965
C1-185-235	646	2019-01-20	2.6553	1644.18	3.66965e+19	1.08171e-13	4.38237e-15	1.03789e-13	3.80868e+06	1.43437e+06	7.70558e-15	4.66143e-15	9.00582e-15	330482	124461
C1-235-310	646	2019-01-20	2.586	1619.34	3.61421e+19	8.49994e-14	4.38237e-15	8.0617e-14	2.91367e+06	1.12671e+06	5.48934e-15	4.66143e-15	7.20151e-15	260277	100649
C1-310-350	646	2019-01-20	5.2484	1688.75	3.76913e+19	1.16627e-13	4.38237e-15	1.12245e-13	4.23065e+06	806083	6.08672e-15	4.66143e-15	7.66662e-15	288965	55057.7
C1-500-582	646	2019-01-20	7.8121	1816.46	4.05415e+19	8.76414e-14	4.38237e-15	8.3259e-14	3.37544e+06	432079	6.05863e-15	4.66143e-15	7.64434e-15	309913	39670.9
C1-582-649	646	2019-01-20	10.4209	1978.29	4.41535e+19	9.74728e-14	4.38237e-15	9.30904e-14	4.11027e+06	394425	5.86647e-15	4.66143e-15	7.49295e-15	330840	31747.7
C1-781-819	646	2019-01-20	10.4503	1886.57	4.21064e+19	1.22238e-13	4.38237e-15	1.17856e-13	4.96248e+06	474865	6.9791e-15	4.66143e-15	8.39266e-15	353385	33815.8
C1-819-879	646	2019-01-20	20.0278	2493	5.56413e+19	1.76926e-13	4.38237e-15	1.72544e-13	9.60056e+06	479362	9.94725e-15	4.66143e-15	1.09853e-14	611236	30519.4
C1-879-944	646	2019-01-20	16.5967	2143.94	4.78506e+19	1.64031e-13	4.38237e-15	1.59649e-13	7.63929e+06	460289	1.23103e-14	4.66143e-15	1.31633e-14	629872	37951.6

## Sheet: Journal-Style Table
Sample Name	Quartz Mass (g)	Total 27Al Quantified by ICP-OES (μg)*	AMS Cathode Number	Uncorrected 26Al/27Al Ratio**	Uncorrected 26Al/27Al Ratio Uncertainty**	Background-Corrected 26Al/27Al Ratio	Background-Corrected 26Al/27Al Ratio Uncertainty	26Al Concentration (atoms g-1)	26Al Concentration Uncertainty (atoms g-1)
Pit2-6-14	20.6733	1809.14	153404	3.47413e-11	6.19006e-13	3.47369e-11	6.19023e-13	6.78466e+07	1.20905e+06
Pit2-14-17	21.9411	1924.91	153406	3.43884e-11	7.18457e-13	3.4384e-11	7.18472e-13	6.73261e+07	1.40682e+06
Pit2-23-29	21.8446	1724.01	153407	3.6019e-11	7.57177e-13	3.60146e-11	7.57191e-13	6.34379e+07	1.33375e+06
Pit2-37-43	12.7551	1763.6	153408	1.88619e-11	3.85653e-13	1.88575e-11	3.85681e-13	5.81936e+07	1.1902e+06
Pit2-43-50	18.8236	1473.21	153409	2.03801e-11	4.21319e-13	2.03757e-11	4.21345e-13	3.55918e+07	735994
Pit2-56-62	12.6866	1634.38	153410	8.11814e-12	1.84164e-13	8.11376e-12	1.84223e-13	2.33294e+07	529695
C1-5-36	1.8134	1586.67	153412	2.34345e-13	9.6541e-15	2.29963e-13	1.07206e-14	4.4908e+06	209356
C1-36-48	2.2931	1616.68	153413	2.25673e-13	8.08234e-15	2.21291e-13	9.33022e-15	3.48208e+06	146814
C1-48-70	2.5156	1683.24	153414	2.05693e-13	8.72104e-15	2.01311e-13	9.88865e-15	3.0064e+06	147678
C1-70-100	1.5451	1593.69	153415	1.90802e-13	8.11448e-15	1.8642e-13	9.35808e-15	4.29155e+06	215432
C1-107-125	11.1057	2116.47	153416	7.83931e-13	1.97227e-14	7.79549e-13	2.02661e-14	3.31577e+06	86200.6
C1-125-145	5.7661	1855.78	153417	3.94607e-13	1.3555e-14	3.90225e-13	1.43341e-14	2.80307e+06	102965
C1-185-235	2.6553	1644.18	153419	1.08171e-13	7.70558e-15	1.03789e-13	9.00582e-15	1.43437e+06	124461
C1-235-310	2.586	1619.34	153420	8.49994e-14	5.48934e-15	8.0617e-14	7.20151e-15	1.12671e+06	100649
C1-310-350	5.2484	1688.75	153421	1.16627e-13	6.08672e-15	1.12245e-13	7.66662e-15	806083	55057.7
C1-500-582	7.8121	1816.46	153422	8.76414e-14	6.05863e-15	8.3259e-14	7.64434e-15	432079	39670.9
C1-582-649	10.4209	1978.29	153423	9.74728e-14	5.86647e-15	9.30904e-14	7.49295e-15	394425	31747.7
C1-781-819	10.4503	1886.57	153425	1.22238e-13	6.9791e-15	1.17856e-13	8.39266e-15	474865	33815.8
C1-819-879	20.0278	2493	153426	1.76926e-13	9.94725e-15	1.72544e-13	1.09853e-14	479362	30519.4
C1-879-944	16.5967	2143.94	153427	1.64031e-13	1.23103e-14	1.59649e-13	1.31633e-14	460289	37951.6
*27Al was added only to samples with insufficient total Al through commercial SPEX ICP standard with a concentration of 1000 μg mL-1. The total here reflects the sum of Al added through carrier and native Al in quartz.
**Isotopic analysis was conducted at PRIME Laboratory; ratios were normalized against standard KNSTD-01-5-2 with an assumed ratio of 1.818 x 10-12 (Nishiizumi et al., 2004).

## Sheet: Greg's 26Al Calculations
CONSTANTS
Atomic Mass of Al (g/mol):			26.9815
Avogadro's Number (atoms/mol):			6.022e+23
			SAMPLE PREPARATION DATA			CALCULATIONS TO DETERMINE CONCENTRATION					CALCULATIONS TO DETERMINE UNCERTAINTY					BLK
Sample Name	UVM Batch Number	Al Analysis Date	Quartz Mass (g)	Total 27Al Quantified by ICP-OES (μg)	Calculate: Total 27Al Atoms	From AMS: Uncorrected 26Al/27Al Ratio	Calculate: Uncorrected 26Al Atoms	Background 26Al Atoms	Calculate: Background-Corrected 26Al Atoms	Calculate: 26Al Atoms/g	From AMS: Uncorrected 26Al/27Al Ratio Uncertainty	From "Blanks" Sheet: Background 26Al/27Al Ratio Uncertainty	Calculate: Background-Corrected 26Al/27Al Ratio Uncertainty	Calculate: Uncertainty 26Al Atoms	Calculate: Uncertainty 26Al Atoms/g	BLK/sample ratio
Pit2-6-14	645	2019-01-20	20.6733	1809.14	4.03782e+19	3.47413e-11	1.40279e+09	258915	1.40253e+09	6.78426e+07	6.19006e-13	4.66143e-15	6.19023e-13	2.4995e+07	1.20905e+06	0.0184572
Pit2-14-17	645	2019-01-20	21.9411	1924.91	4.29621e+19	3.43884e-11	1.4774e+09	258915	1.47714e+09	6.73229e+07	7.18457e-13	4.66143e-15	7.18472e-13	3.08671e+07	1.40682e+06	0.0175251
Pit2-23-29	645	2019-01-20	21.8446	1724.01	3.84781e+19	3.6019e-11	1.38594e+09	258915	1.38569e+09	6.34338e+07	7.57177e-13	4.66143e-15	7.57191e-13	2.91353e+07	1.33375e+06	0.0186815
Pit2-37-43	645	2019-01-20	12.7551	1763.6	3.93618e+19	1.88619e-11	7.42438e+08	258915	7.42179e+08	5.81868e+07	3.85653e-13	4.66143e-15	3.85681e-13	1.51811e+07	1.1902e+06	0.0348737
Pit2-43-50	645	2019-01-20	18.8236	1473.21	3.28806e+19	2.03801e-11	6.70109e+08	258915	6.6985e+08	3.55857e+07	4.21319e-13	4.66143e-15	4.21345e-13	1.38541e+07	735994	0.0386378
Pit2-56-62	645	2019-01-20	12.6866	1634.38	3.64777e+19	8.11814e-12	2.96131e+08	258915	2.95872e+08	2.33216e+07	1.84164e-13	4.66143e-15	1.84223e-13	6.72003e+06	529695	0.0874327
C1-5-36	645	2019-01-20	1.8134	1586.67	3.54128e+19	2.34345e-13	8.29881e+06	258915	8.0399e+06	4.43361e+06	9.6541e-15	4.66143e-15	1.07206e-14	379645	209356	3.11991
C1-36-48	645	2019-01-20	2.2931	1616.68	3.60826e+19	2.25673e-13	8.14288e+06	258915	7.88396e+06	3.43812e+06	8.08234e-15	4.66143e-15	9.33022e-15	336659	146814	3.17965
C1-48-70	645	2019-01-20	2.5156	1683.24	3.75683e+19	2.05693e-13	7.72753e+06	258915	7.46861e+06	2.96892e+06	8.72104e-15	4.66143e-15	9.88865e-15	371499	147678	3.35056
C1-70-100	645	2019-01-20	1.5451	1593.69	3.55696e+19	1.90802e-13	6.78675e+06	258915	6.52784e+06	4.22486e+06	8.11448e-15	4.66143e-15	9.35808e-15	332863	215432	3.81501
BLK-645	645	2019-01-21	0	1510.8	3.37195e+19	7.67849e-15	258915				1.3472e-15	1.3472e-15	1.3472e-15	45427		100
C1-107-125	646	2019-01-20	11.1057	2116.47	4.72375e+19	7.83931e-13	3.70309e+07	36605.7	3.69943e+07	3.33111e+06	1.97227e-14	4.66143e-15	2.02661e-14	957318	86200.6	0.0988517
C1-125-145	646	2019-01-20	5.7661	1855.78	4.14192e+19	3.94607e-13	1.63443e+07	36605.7	1.63077e+07	2.8282e+06	1.3555e-14	4.66143e-15	1.43341e-14	593707	102965	0.223966
C1-185-235	646	2019-01-20	2.6553	1644.18	3.66965e+19	1.08171e-13	3.9695e+06	36605.7	3.93289e+06	1.48115e+06	7.70558e-15	4.66143e-15	9.00582e-15	330482	124461	0.922175
C1-235-310	646	2019-01-20	2.586	1619.34	3.61421e+19	8.49994e-14	3.07205e+06	36605.7	3.03545e+06	1.1738e+06	5.48934e-15	4.66143e-15	7.20151e-15	260277	100649	1.19157
C1-310-350	646	2019-01-20	5.2484	1688.75	3.76913e+19	1.16627e-13	4.39582e+06	36605.7	4.35922e+06	830580	6.08672e-15	4.66143e-15	7.66662e-15	288965	55057.7	0.832738
C1-500-582	646	2019-01-20	7.8121	1816.46	4.05415e+19	8.76414e-14	3.55311e+06	36605.7	3.51651e+06	450136	6.05863e-15	4.66143e-15	7.64434e-15	309913	39670.9	1.03024
C1-582-649	646	2019-01-20	10.4209	1978.29	4.41535e+19	9.74728e-14	4.30376e+06	36605.7	4.26716e+06	409481	5.86647e-15	4.66143e-15	7.49295e-15	330840	31747.7	0.850551
C1-781-819	646	2019-01-20	10.4503	1886.57	4.21064e+19	1.22238e-13	5.14701e+06	36605.7	5.1104e+06	489020	6.9791e-15	4.66143e-15	8.39266e-15	353385	33815.8	0.711204
C1-819-879	646	2019-01-20	20.0278	2493	5.56413e+19	1.76926e-13	9.8444e+06	36605.7	9.80779e+06	489709	9.94725e-15	4.66143e-15	1.09853e-14	611236	30519.4	0.371843
C1-879-944	646	2019-01-20	16.5967	2143.94	4.78506e+19	1.64031e-13	7.84898e+06	36605.7	7.81238e+06	470719	1.23103e-14	4.66143e-15	1.31633e-14	629872	37951.6	0.466375
BLK-646	646	2019-01-21	0	1509.9	3.36995e+19	1.08624e-15	36605.7				5.88198e-16	5.88198e-16	5.88198e-16	19821.9		100
							258915	45427
							259000	45000
							36605.7	19821.9
							37000	20000
