# Supplementary material for: Cosmogenic nuclide dating of two stacked ice masses: Ong Valley, Antarctica
Source: Copernicus journal article supplement (doi:10.5194/tc-2022-18), 2022-02-02
Supplement: Supplementary file 3 [file Table_S_OV_OD1_Be10_UVM.xlsx]

## Sheet: Blanks
Blank Name	UVM Batch Number	Cathode Number	Be Analysis Date	Added Be carrier (g)		From AMS: 10Be/9Be Ratio	From AMS: 10Be/9Be Ratio Uncertainty
BLK	645	BE45474	2018-11-16	0.8432		9.21975e-16	2.0634e-16
BLK	646	BE45487	2018-11-16	0.8403		2.46383e-15	5.7912e-16
			AVERAGE	0.84175		1.6929e-15
			STDEV	0.00205061		1.09025e-15
For your background correction, I'd suggest using the average and STDEV of your two blanks. The two batches were processed at about the same time, on the same carrier, by the same operator, and in the same hood, then run at the same time on the AMS. So we usually average in that situation, since it gives a better idea of the uncertainty on the blank. Although we can definitely discuss other optio…

## Sheet: 10Be Calculations
CONSTANTS
Density of 9Be Carrier (g/mL):			1.012
Atomic Mass of Be (g/mol):			9.01218
Avogadro's Number (atoms/mol):			6.022e+23
			SAMPLE PREPARATION DATA				CALCULATIONS TO DETERMINE CONCENTRATION					CALCULATIONS TO DETERMINE UNCERTAINTY
Sample Name	UVM Batch Number	Be Analysis Date	Quartz Mass (g)	Mass of 9Be Carrier Added (g)	Concentration of 9Be Carrier Added (μg/mL)	Calculate: 9Be Atoms Added	From AMS: Uncorrected 10Be/9Be Ratio	From "Blanks" Sheet: Background 10Be/9Be Ratio	Calculate: Background-Corrected 10Be/9Be Ratio	Calculate: 10Be Atoms	Calculate: 10Be Atoms/g	From AMS: Uncorrected 10Be/9Be Ratio Uncertainty	From "Blanks" Sheet: Background 10Be/9Be Ratio Uncertainty	Calculate: Background-Corrected 10Be/9Be Ratio Uncertainty	Calculate: Uncertainty 10Be Atoms	Calculate: Uncertainty 10Be Atoms/g
Pit2-6-14	645	2018-11-16	20.6733	0.8411	291	1.61611e+19	1.71818e-11	1.6929e-15	1.71801e-11	2.77649e+08	1.34303e+07	1.07727e-13	1.09025e-15	1.07733e-13	1.74108e+06	84218.9
Pit2-14-17	645	2018-11-16	21.9411	0.8413	291	1.61649e+19	1.83412e-11	1.6929e-15	1.83395e-11	2.96456e+08	1.35115e+07	1.15342e-13	1.09025e-15	1.15348e-13	1.86459e+06	84981.4
Pit2-23-29	645	2018-11-16	21.8446	0.8407	291	1.61534e+19	1.74005e-11	1.6929e-15	1.73988e-11	2.8105e+08	1.28659e+07	1.08702e-13	1.09025e-15	1.08707e-13	1.75599e+06	80385.7
Pit2-37-43	645	2018-11-16	12.7551	0.8405	291	1.61496e+19	9.15683e-12	1.6929e-15	9.15514e-12	1.47852e+08	1.15916e+07	5.53895e-14	1.09025e-15	5.54002e-14	894689	70143.7
Pit2-43-50	645	2018-11-16	18.8236	0.8397	291	1.61342e+19	7.7464e-12	1.6929e-15	7.74471e-12	1.24955e+08	6.63819e+06	6.92422e-14	1.09025e-15	6.92508e-14	1.11731e+06	59356.6
Pit2-56-62	645	2018-11-16	12.6866	0.8381	291	1.61035e+19	3.34619e-12	1.6929e-15	3.34449e-12	5.38579e+07	4.24526e+06	4.11326e-14	1.09025e-15	4.11471e-14	662610	52229.1
C1-5-36	645	2018-11-16	1.8134	0.8407	291	1.61534e+19	8.04869e-14	1.6929e-15	7.8794e-14	1.27279e+06	701881	2.01381e-15	1.09025e-15	2.29e-15	36991.3	20398.8
C1-36-48	645	2018-11-16	2.2931	0.8407	291	1.61534e+19	8.22117e-14	1.6929e-15	8.05188e-14	1.30065e+06	567203	1.60284e-15	1.09025e-15	1.93849e-15	31313.2	13655.4
C1-48-70	645	2018-11-16	2.5156	0.8363	291	1.60689e+19	9.05758e-14	1.6929e-15	8.88829e-14	1.42825e+06	567757	1.77213e-15	1.09025e-15	2.08065e-15	33433.7	13290.5
C1-70-100	645	2018-11-16	1.5451	0.8364	291	1.60708e+19	1.41198e-13	1.6929e-15	1.39505e-13	2.24195e+06	1.45101e+06	2.62257e-15	1.09025e-15	2.84016e-15	45643.7	29540.9
C1-107-125	646	2018-11-16	11.1057	0.8402	291	1.61438e+19	7.56727e-13	1.6929e-15	7.55034e-13	1.21891e+07	1.09756e+06	6.7203e-15	1.09025e-15	6.80816e-15	109910	9896.69
C1-125-145	646	2018-11-16	5.7661	0.8418	291	1.61745e+19	3.12993e-13	1.6929e-15	3.113e-13	5.03514e+06	873231	5.80574e-15	1.09025e-15	5.90722e-15	95546.6	16570.4
C1-185-235	646	2018-11-16	2.6553	0.838	291	1.61015e+19	5.0042e-14	1.6929e-15	4.83491e-14	778495	293185	1.26455e-15	1.09025e-15	1.66965e-15	26883.9	10124.6
C1-235-310	646	2018-11-16	2.586	0.8368	291	1.60785e+19	2.82578e-14	1.6929e-15	2.65649e-14	427122	165167	9.519e-16	1.09025e-15	1.44733e-15	23270.9	8998.79
C1-310-350	646	2018-11-16	5.2484	0.8386	291	1.61131e+19	4.02947e-14	1.6929e-15	3.86018e-14	621994	118511	1.12832e-15	1.09025e-15	1.569e-15	25281.3	4816.96
C1-500-582	646	2018-11-16	7.8121	0.8378	291	1.60977e+19	7.42283e-14	1.6929e-15	7.25354e-14	1.16765e+06	149467	1.65813e-15	1.09025e-15	1.98445e-15	31945.1	4089.18
C1-582-649	646	2018-11-16	10.4209	0.8386	291	1.61131e+19	8.80636e-14	1.6929e-15	8.63707e-14	1.3917e+06	133549	1.77127e-15	1.09025e-15	2.07992e-15	33513.9	3216.03
C1-781-819	646	2018-11-16	10.4503	0.8393	291	1.61265e+19	2.73629e-13	1.6929e-15	2.71936e-13	4.38538e+06	419642	5.13627e-15	1.09025e-15	5.25071e-15	84675.6	8102.7
C1-819-879	646	2018-11-16	20.0278	0.8353	291	1.60497e+19	6.46349e-13	1.6929e-15	6.44656e-13	1.03465e+07	516608	1.20558e-14	1.09025e-15	1.2105e-14	194281	9700.56
C1-879-944	646	2018-11-16	16.5967	0.8336	291	1.6017e+19	5.01538e-13	1.6929e-15	4.99845e-13	8.00602e+06	482386	9.39161e-15	1.09025e-15	9.45468e-15	151435	9124.43

## Sheet: Journal-Style Table
Sample Name	Quartz Mass (g)	Mass of 9Be Added (μg)*	AMS Cathode Number	Uncorrected 10Be/9Be Ratio**	Uncorrected 10Be/9Be Ratio Uncertainty**	Background-Corrected 10Be/9Be Ratio	Background-Corrected 10Be/9Be Ratio Uncertainty	10Be Concentration (atoms g-1)	10Be Concentration Uncertainty (atoms g-1)
Pit2-6-14	20.6733	241.858	BE45473	1.71818e-11	1.07727e-13	1.71801e-11	1.07733e-13	1.34303e+07	84218.9
Pit2-14-17	21.9411	241.915	BE45475	1.83412e-11	1.15342e-13	1.83395e-11	1.15348e-13	1.35115e+07	84981.4
Pit2-23-29	21.8446	241.743	BE45476	1.74005e-11	1.08702e-13	1.73988e-11	1.08707e-13	1.28659e+07	80385.7
Pit2-37-43	12.7551	241.685	BE45477	9.15683e-12	5.53895e-14	9.15514e-12	5.54002e-14	1.15916e+07	70143.7
Pit2-43-50	18.8236	241.455	BE45478	7.7464e-12	6.92422e-14	7.74471e-12	6.92508e-14	6.63819e+06	59356.6
Pit2-56-62	12.6866	240.995	BE45479	3.34619e-12	4.11326e-14	3.34449e-12	4.11471e-14	4.24526e+06	52229.1
C1-5-36	1.8134	241.743	BE45481	8.04869e-14	2.01381e-15	7.8794e-14	2.29e-15	701881	20398.8
C1-36-48	2.2931	241.743	BE45482	8.22117e-14	1.60284e-15	8.05188e-14	1.93849e-15	567203	13655.4
C1-48-70	2.5156	240.478	BE45483	9.05758e-14	1.77213e-15	8.88829e-14	2.08065e-15	567757	13290.5
C1-70-100	1.5451	240.506	BE45484	1.41198e-13	2.62257e-15	1.39505e-13	2.84016e-15	1.45101e+06	29540.9
C1-107-125	11.1057	241.599	BE45485	7.56727e-13	6.7203e-15	7.55034e-13	6.80816e-15	1.09756e+06	9896.69
C1-125-145	5.7661	242.059	BE45486	3.12993e-13	5.80574e-15	3.113e-13	5.90722e-15	873231	16570.4
C1-185-235	2.6553	240.966	BE45488	5.0042e-14	1.26455e-15	4.83491e-14	1.66965e-15	293185	10124.6
C1-235-310	2.586	240.621	BE45489	2.82578e-14	9.519e-16	2.65649e-14	1.44733e-15	165167	8998.79
C1-310-350	5.2484	241.139	BE45490	4.02947e-14	1.12832e-15	3.86018e-14	1.569e-15	118511	4816.96
C1-500-582	7.8121	240.909	BE45491	7.42283e-14	1.65813e-15	7.25354e-14	1.98445e-15	149467	4089.18
C1-582-649	10.4209	241.139	BE45492	8.80636e-14	1.77127e-15	8.63707e-14	2.07992e-15	133549	3216.03
C1-781-819	10.4503	241.34	BE45494	2.73629e-13	5.13627e-15	2.71936e-13	5.25071e-15	419642	8102.7
C1-819-879	20.0278	240.19	BE45495	6.46349e-13	1.20558e-14	6.44656e-13	1.2105e-14	516608	9700.56
C1-879-944	16.5967	239.701	BE45496	5.01538e-13	9.39161e-15	4.99845e-13	9.45468e-15	482386	9124.43
*9Be was added through a beryl carrier made at University of Vermont with a concentration of 291 μg mL-1.
**Isotopic analysis was conducted at Lawrence Livermore National Laboratory; ratios were normalized against standard 07KNSTD3110 with an assumed ratio of 2850 x 10-15 (Nishiizumi et al., 2007).

## Sheet: Greg's 10Be Calculations
CONSTANTS
Density of 9Be Carrier (g/mL):			1.012
Atomic Mass of Be (g/mol):			9.01218
Avogadro's Number (atoms/mol):			6.022e+23
			SAMPLE PREPARATION DATA				CALCULATIONS TO DETERMINE CONCENTRATION					CALCULATIONS TO DETERMINE UNCERTAINTY					BLK
Sample Name	UVM Batch Number	Be Analysis Date	Quartz Mass (g)	Mass of 9Be Carrier Added (g)	Concentration of 9Be Carrier Added (μg/mL)	Calculate: 9Be Atoms Added	From AMS: Uncorrected 10Be/9Be Ratio	Calculate: Uncorrected 10Be Atoms	Background 10Be Atoms	Calculate: Background-Corrected 10Be Atoms	Calculate: 10Be Atoms/g	From AMS: Uncorrected 10Be/9Be Ratio Uncertainty	From "Blanks" Sheet: Background 10Be/9Be Ratio Uncertainty	Calculate: Background-Corrected 10Be/9Be Ratio Uncertainty	Calculate: Uncertainty 10Be Atoms	Calculate: Uncertainty 10Be Atoms/g	BLK/sample ratio
Pit2-6-14	645	2018-11-16	20.6733	0.8411	291	1.61611e+19	1.71818e-11	2.77677e+08	14937.3	2.77662e+08	1.34309e+07	1.07727e-13	1.09025e-15	1.07733e-13	1.74108e+06	84218.9	0.0053794
Pit2-14-17	645	2018-11-16	21.9411	0.8413	291	1.61649e+19	1.83412e-11	2.96484e+08	14937.3	2.96469e+08	1.3512e+07	1.15342e-13	1.09025e-15	1.15348e-13	1.86459e+06	84981.4	0.00503816
Pit2-23-29	645	2018-11-16	21.8446	0.8407	291	1.61534e+19	1.74005e-11	2.81078e+08	14937.3	2.81063e+08	1.28665e+07	1.08702e-13	1.09025e-15	1.08707e-13	1.75599e+06	80385.7	0.00531431
Pit2-37-43	645	2018-11-16	12.7551	0.8405	291	1.61496e+19	9.15683e-12	1.47879e+08	14937.3	1.47864e+08	1.15925e+07	5.53895e-14	1.09025e-15	5.54002e-14	894689	70143.7	0.0101011
Pit2-43-50	645	2018-11-16	18.8236	0.8397	291	1.61342e+19	7.7464e-12	1.24982e+08	14937.3	1.24967e+08	6.63885e+06	6.92422e-14	1.09025e-15	6.92508e-14	1.11731e+06	59356.6	0.0119516
Pit2-56-62	645	2018-11-16	12.6866	0.8381	291	1.61035e+19	3.34619e-12	5.38852e+07	14937.3	5.38703e+07	4.24623e+06	4.11326e-14	1.09025e-15	4.11471e-14	662610	52229.1	0.0277207
C1-5-36	645	2018-11-16	1.8134	0.8407	291	1.61534e+19	8.04869e-14	1.30014e+06	14937.3	1.2852e+06	708724	2.01381e-15	1.09025e-15	2.29e-15	36991.3	20398.8	1.1489
C1-36-48	645	2018-11-16	2.2931	0.8407	291	1.61534e+19	8.22117e-14	1.328e+06	14937.3	1.31306e+06	572614	1.60284e-15	1.09025e-15	1.93849e-15	31313.2	13655.4	1.1248
C1-48-70	645	2018-11-16	2.5156	0.8363	291	1.60689e+19	9.05758e-14	1.45545e+06	14937.3	1.44051e+06	572633	1.77213e-15	1.09025e-15	2.08065e-15	33433.7	13290.5	1.0263
C1-70-100	645	2018-11-16	1.5451	0.8364	291	1.60708e+19	1.41198e-13	2.26916e+06	14937.3	2.25422e+06	1.45895e+06	2.62257e-15	1.09025e-15	2.84016e-15	45643.7	29540.9	0.658277
BLK-645	645	2018-11-17	0	0.8432	291	1.62014e+19	9.21975e-16	14937.3				2.0634e-16	2.0634e-16	2.0634e-16	3343.01		100
C1-107-125	646	2018-11-16	11.1057	0.8402	291	1.61438e+19	7.56727e-13	1.22165e+07	39780.2	1.21767e+07	1.09643e+06	6.7203e-15	1.09025e-15	6.80816e-15	109910	9896.69	0.325628
C1-125-145	646	2018-11-16	5.7661	0.8418	291	1.61745e+19	3.12993e-13	5.06252e+06	39780.2	5.02274e+06	871081	5.80574e-15	1.09025e-15	5.90722e-15	95546.6	16570.4	0.78578
C1-185-235	646	2018-11-16	2.6553	0.838	291	1.61015e+19	5.0042e-14	805753	39780.2	765973	288469	1.26455e-15	1.09025e-15	1.66965e-15	26883.9	10124.6	4.93703
C1-235-310	646	2018-11-16	2.586	0.8368	291	1.60785e+19	2.82578e-14	454342	39780.2	414561	160310	9.519e-16	1.09025e-15	1.44733e-15	23270.9	8998.79	8.75558
C1-310-350	646	2018-11-16	5.2484	0.8386	291	1.61131e+19	4.02947e-14	649271	39780.2	609491	116129	1.12832e-15	1.09025e-15	1.569e-15	25281.3	4816.96	6.12691
C1-500-582	646	2018-11-16	7.8121	0.8378	291	1.60977e+19	7.42283e-14	1.1949e+06	39780.2	1.15512e+06	147863	1.65813e-15	1.09025e-15	1.98445e-15	31945.1	4089.18	3.32916
C1-582-649	646	2018-11-16	10.4209	0.8386	291	1.61131e+19	8.80636e-14	1.41897e+06	39780.2	1.37919e+06	132349	1.77127e-15	1.09025e-15	2.07992e-15	33513.9	3216.03	2.80345
C1-781-819	646	2018-11-16	10.4503	0.8393	291	1.61265e+19	2.73629e-13	4.41268e+06	39780.2	4.3729e+06	418448	5.13627e-15	1.09025e-15	5.25071e-15	84675.6	8102.7	0.901498
C1-819-879	646	2018-11-16	20.0278	0.8353	291	1.60497e+19	6.46349e-13	1.03737e+07	39780.2	1.03339e+07	515978	1.20558e-14	1.09025e-15	1.2105e-14	194281	9700.56	0.383473
C1-879-944	646	2018-11-16	16.5967	0.8336	291	1.6017e+19	5.01538e-13	8.03313e+06	39780.2	7.99335e+06	481623	9.39161e-15	1.09025e-15	9.45468e-15	151435	9124.43	0.495202
BLK-646	646	2018-11-17	0	0.8403	291	1.61457e+19	2.46383e-15	39780.2				5.7912e-16	5.7912e-16	5.7912e-16	9350.31		100
									14937.3	3343.01
									14900	3300
									39780.2	9350.31
									39800	9400
