# Supplementary material for: Cosmogenic nuclide dating of two stacked ice masses: Ong Valley, Antarctica
Source: Copernicus journal article supplement (doi:10.5194/tc-2022-18), 2022-02-02
Supplement: Supplementary file 5 [file Table_S_OV_OD1_surface_Ne21_BGC.xlsx]

## Sheet: for print
Table SX. Step-degassing Ne isotope measurements for samples from Ong Valley surface ablation till at OD1 drill site. Run on BGC "Ohio" system, September 2019. Note: "n.d" = not detected.
			Heating	Heating																Excess 21Ne				Excess 21Ne as	Percent of total	Total
		Aliquot	temperature	time	Total 20Ne released1			Total 21Ne released2			Total 22Ne released3			21Ne / 20Ne4			22Ne / 20Ne4			This heating step				% of 21Ne released	excess 21Ne	excess 21Ne
Sample name	Aliquot	weight (g)	(deg C)	(hr)	(109 atoms)			(106 atoms)			(106 atoms)			(10-3)			(10-3)			(106 atoms g-1)				in this heating step	released in this step	(106 atoms g-1)
17-OD1-SURF1	a	0.1745	850	0.25	0.609791	+/-	0.0272979	23.5797	+/-	0.773624	86.8121	+/-	3.32175	38.397	+/-	1.126	141.8	+/-	4.5	124.787	+/-	4.45748		92.3478	99.4808	125.438	+/-	4.46664
			1100	0.25	0.0459787	+/-	0.0105997	0.249693	+/-	0.0388214	4.20298	+/-	1.10866	5.387	+/-	1.477	91.2	+/-	31.4	0.651243	+/-	0.286007		45.5127	0.519173
17-OD1-SURF2	a	0.1621	850	0.25	0.848452	+/-	0.0314225	22.9266	+/-	0.737406	109.649	+/-	3.9352	26.82	+/-	0.438	128.7	+/-	2.3	125.947	+/-	4.5851		89.0495	98.9745	127.252	+/-	4.59601
			1100	0.25	0.0826451	+/-	0.00959488	0.456087	+/-	0.0427467	8.78104	+/-	1.14769	5.485	+/-	0.773	106	+/-	17.6	1.305	+/-	0.316571		46.3815	1.02552
17-OD1-SURF3	a	0.1719	850	0.25	0.536679	+/-	0.0212802	25.7325	+/-	0.804739	81.9142	+/-	3.02606	47.589	+/-	0.96	152	+/-	3.7	140.457	+/-	4.69574		93.8287	99.3382	141.392	+/-	4.70331
			1100	0.25	0.0378463	+/-	0.00927248	0.272845	+/-	0.0367138	3.99586	+/-	1.11186	7.154	+/-	1.945	105.2	+/-	38.3	0.935765	+/-	0.266629		58.9558	0.661822
17-OD1-SURF4	a	0.1737	850	0.25	0.65085	+/-	0.0246465	24.1764	+/-	0.754396	92.032	+/-	3.41258	36.874	+/-	0.596	140.8	+/-	3	128.098	+/-	4.36335		92.0341	99.6781	128.511	+/-	4.37134
			1100	0.25	0.0519111	+/-	0.00885954	0.225461	+/-	0.0376645	5.60134	+/-	1.16022	4.313	+/-	0.999	107.6	+/-	28	0.413681	+/-	0.264189		31.8708	0.321903
1 Computed by comparison to 20Ne signal in air standards. 1-sigma uncertainty includes measurement uncertainty of 20Ne signal in this analysis and the reproducibility of the air standards
2 Computed by comparison to 21Ne signal in air standards. 1-sigma uncertainty includes measurement uncertainty of 21Ne signal in this analysis and the reproducibility of the air standards
3 Computed by comparison to 22Ne signal in air standards. 1-sigma uncertainty includes measurement uncertainty of 22Ne signal in this analysis and the reproducibility of the air standards
4 Isotope ratio measured internally during each analysis and corrected for mass discrimination based on an air standard. Does not involve normalization to the Ne isotope signals in the standards, so the ratio computed from absolute Ne isotope amounts in previous columns may differ within uncertainty.

## Sheet: summary
sample_name	aliquot	aliquot_wt_g	analysis_date	N21xs_atoms_g	delN21xs_atoms_g	system
1. Samples of unconsolidated sediment from ablation till
17-OD1-SURF1	a	0.1745	2019-09-01	1.25438e+08	4.46664e+06	BGC-Ohio
17-OD1-SURF2	a	0.1621	2019-09-01	1.27252e+08	4.59601e+06	BGC-Ohio
17-OD1-SURF3	a	0.1719	2019-09-01	1.41392e+08	4.70331e+06	BGC-Ohio
17-OD1-SURF4	a	0.1737	2019-09-01	1.28511e+08	4.37134e+06	BGC-Ohio

## Sheet: summary ratios
Sample	temp	N20	delN20	N21	delN21	N22	delN22	r2120	delr2120	r2220	delr2220
Unconsolidated ablation till
17-OD1-SURF1	850	6.09791e+08	2.72979e+07	2.35797e+07	773624	8.68121e+07	3.32175e+06	0.038397	0.001126	0.1418	0.0045
17-OD1-SURF1	1100	4.59787e+07	1.05997e+07	249693	38821.4	4.20298e+06	1.10866e+06	0.005387	0.001477	0.0912	0.0314
17-OD1-SURF2	850	8.48452e+08	3.14225e+07	2.29266e+07	737406	1.09649e+08	3.9352e+06	0.02682	0.000438	0.1287	0.0023
17-OD1-SURF2	1100	8.26451e+07	9.59488e+06	456087	42746.7	8.78104e+06	1.14769e+06	0.005485	0.000773	0.106	0.0176
17-OD1-SURF3	850	5.36679e+08	2.12802e+07	2.57325e+07	804739	8.19142e+07	3.02606e+06	0.047589	0.00096	0.152	0.0037
17-OD1-SURF3	1100	3.78463e+07	9.27248e+06	272845	36713.8	3.99586e+06	1.11186e+06	0.007154	0.001945	0.1052	0.0383
17-OD1-SURF4	850	6.5085e+08	2.46465e+07	2.41764e+07	754396	9.2032e+07	3.41258e+06	0.036874	0.000596	0.1408	0.003
17-OD1-SURF4	1100	5.19111e+07	8.85954e+06	225461	37664.5	5.60134e+06	1.16022e+06	0.004313	0.000999	0.1076	0.028
