# Supplementary material for: Cosmogenic nuclide dating of two stacked ice masses: Ong Valley, Antarctica
Source: Copernicus journal article supplement (doi:10.5194/tc-2022-18), 2022-02-02
Supplement: Supplementary file 6 [file Table_S_OV_middle_boulders_Be10_BGC.xlsx]

## Sheet: Sheet1
Table SX. Be-10 concentrations in quartz from Ong Valley surface boulders.
	Mass of quartz	Chemical
Sample name	dissolved (g)	preparation lab	AMS lab	AMS ID		[Be-10] (Matoms/g)
Analyzed at UVM and PRIME
17-OV-212-ERR	10.9563	UVM	PRIME	157717	19.0893	+/-	0.14208
17-OV-213-ERR	5.6441	UVM	PRIME	157718	18.4775	+/-	0.230124
17-OV-214-ERR	6.4486	UVM	PRIME	157719	18.54	+/-	0.225753
17-OV-215-ERR	19.1083	UVM	PRIME	157720	17.4162	+/-	0.137672
17-OV-217-ERR	19.3843	UVM	PRIME	157721	18.1061	+/-	0.193621
17-OV-218-ERR	19.4441	UVM	PRIME	157723	19.6335	+/-	0.177583
Analyzed at LLNL
11-OV-ER-117	0.904272	LLNL	LLNL	BE46147	25.1529	+/-	0.425469
11-OV-ER-118	1.04294	LLNL	LLNL	BE46148	27.4852	+/-	0.463148
11-OV-ER-119	1.04932	LLNL	LLNL	BE46149	28.2829	+/-	0.449486
Notes:
1. Samples analyzed at UVM/PRIME reflect a blank subtraction of 88000 +/- 31000 atoms Be-10 ( < 0.1% of total atoms present).
2. Samples analyzed at LLNL reflect a blank subtraction of 24000 +/- 3000 atoms Be-10 (< 0.2% of total atoms present).
3. Be-10 concentrations are normalized to the '07KNSTD' standardization of Nishiizumi et al. (2007).
