# Supplementary material for: Cosmogenic nuclide dating of two stacked ice masses: Ong Valley, Antarctica
Source: Copernicus journal article supplement (doi:10.5194/tc-2022-18), 2022-02-02
Supplement: Supplementary file 7 [file Table_S_OV_middle_boulders_Ne21_BGC.xlsx]

## Sheet: for print
Table SX. Step-degassing Ne isotope measurements for boulder samples from Ong Valley middle drift. Run on BGC "Ohio" system in 2015 and 2019.. Note: "n.d" = not detected.
			Heating	Heating																Excess 21Ne				Excess 21Ne as	Percent of total	Total
		Aliquot	temperature	time	Total 20Ne released1			Total 21Ne released2			Total 22Ne released3			21Ne / 20Ne4			22Ne / 20Ne4			This heating step				% of 21Ne released	excess 21Ne	excess 21Ne
Sample name	Aliquot	weight (g)	(deg C)	(hr)	(109 atoms)			(106 atoms)			(106 atoms)			(10-3)			(10-3)			(106 atoms g-1)				in this heating step	released in this step	(106 atoms g-1)
1. Analyzed September 2019. Concomitant analyses of CRONUS-A yielded 320.9 +/- 6.1 Matoms/g excess 21Ne.
17-OV-212-ERR	a	0.1487	850	0.25	0.483268	+/-	0.018858	19.2462	+/-	0.787064	67.8914	+/-	2.84605	39.269	+/-	0.921	140.1	+/-	4.1	119.813	+/-	5.30625		92.57	99.209	120.768	+/-	5.31612
			1100	0.25	0.0793708	+/-	0.00901411	0.3769	+/-	0.0400847	6.64564	+/-	1.16032	4.719	+/-	0.687	83.5	+/-	16.8	0.955227	+/-	0.323792		37.6869	0.790959
17-OV-213-ERR	a	0.1584	850	0.25	0.349075	+/-	0.0143115	17.8161	+/-	0.733553	53.3118	+/-	2.38566	50.35	+/-	1.359	152.3	+/-	5.4	105.955	+/-	4.63872		94.2024	99.6843	106.29	+/-	4.6471
			1100	0.25	0.0322941	+/-	0.0102149	0.148708	+/-	0.0322175	2.65122	+/-	1.13338	4.605	+/-	1.766	82	+/-	43.6	0.335543	+/-	0.278893		35.7411	0.315685
17-OV-214-ERR	a	0.1566	850	0.25	2.09863	+/-	0.0699466	24.7504	+/-	1.01765	230.299	+/-	8.51386	11.638	+/-	0.142	109.5	+/-	0.9	118.394	+/-	6.63143		74.9101	91.7876	128.987	+/-	6.73522
			1100	0.25	0.672691	+/-	0.0231905	3.64935	+/-	0.171205	69.8842	+/-	2.88471	5.401	+/-	0.155	103.6	+/-	2.5	10.5929	+/-	1.17781		45.4562	8.2124
2. Analyzed November 2019. Concomitant analyses of CRONUS-A yielded 323 +/- 17 Matoms/g excess 21Ne.
17-OV-215-ERR	a	0.1603	850	0.25	0.232459	+/-	0.0110583	16.4462	+/-	0.622322	41.7661	+/-	2.01284	70.684	+/-	2.507	180.6	+/-	7.8	98.3056	+/-	3.88759		95.8176	99.1773	99.1211	+/-	3.89442
			1100	0.25	0.0286043	+/-	0.00552207	0.215361	+/-	0.0331324	2.61083	+/-	1.12429	7.527	+/-	1.813	92.1	+/-	43.2	0.815474	+/-	0.230458		60.6984	0.822705
17-OV-217-ERR	a	0.1674	850	0.25	0.33149	+/-	0.013509	24.111	+/-	0.863797	60.8373	+/-	2.6979	72.653	+/-	1.621	184.4	+/-	5.5	138.173	+/-	5.1656		95.9318	99.8741	138.347	+/-	5.16954
			1100	0.25	0.0314215	+/-	0.00616572	0.122129	+/-	0.0284572	3.06863	+/-	1.14066	3.886	+/-	1.152	98.5	+/-	41	0.174149	+/-	0.201932		23.8704	0.125879
17-OV-218-ERR	a	0.1729	850	0.25	0.485478	+/-	0.0189794	28.0328	+/-	0.995259	79.571	+/-	3.47878	57.658	+/-	1.057	164.7	+/-	4.3	153.824	+/-	5.76543		94.8755	99.7577	154.198	+/-	5.76995
			1100	0.25	0.0611486	+/-	0.00643669	0.245548	+/-	0.0345674	5.60946	+/-	1.18483	3.995	+/-	0.661	92.2	+/-	21.1	0.37368	+/-	0.228266		26.3123	0.242338
3. Analyzed August 2015. Concomitant analyses of CRONUS-A yielded 313.4 +/- 9.0 Matoms/g excess 21Ne.
11-OV-ER-117	a	0.1286	400	0.25	0.1621	+/-	0.0099	22.448	+/-	1.119	42.162	+/-	2.155	137.267	+/-	6.922	254.2	+/-	14.9	169.66	+/-	6.77		97.1947	82.2634	206.24	+/-	6.98508
			850	0.25	0.2433	+/-	0.0117	5.463	+/-	0.302	30.335	+/-	1.926	22.249	+/-	0.9	121.5	+/-	7.2	36.58	+/-	1.72		86.11	17.7366
			1150	0.2	0.0289	+/-	0.0099	0.131	+/-	0.049	4.569	+/-	1.358	4.503	+/-	2.272	154.2	+/-	69.3		n.d.
11-OV-ER-118	a	0.1517	400	0.25	0.7636	+/-	0.03	21.686	+/-	1.077	96.636	+/-	4.224	28.148	+/-	0.52	123.6	+/-	2.9	127.09	+/-	5.1		88.9032	66.2963	191.7	+/-	5.78294
			850	0.25	1.0291	+/-	0.0382	12.812	+/-	0.659	116.724	+/-	4.895	12.337	+/-	0.219	110.5	+/-	2	63.76	+/-	2.68		75.4948	33.2603
			1150	0.2	0.2429	+/-	0.0115	0.856	+/-	0.084	26.299	+/-	1.818	3.49	+/-	0.314	105.5	+/-	6.9	0.85	+/-	0.5		15.0637	0.443401
	b	0.1385	400	0.25	0.755	+/-	0.0278	21.545	+/-	1.05	95.807	+/-	3.974	28.412	+/-	0.5	123.4	+/-	2.9	139.09	+/-	5.28		89.4127	71.1058	195.61	+/-	5.79866
			850	0.25	0.9095	+/-	0.0343	10.349	+/-	0.548	100.643	+/-	4.295	11.374	+/-	0.205	107.7	+/-	2.3	55.39	+/-	2.34		74.1281	28.3165
			1150	0.2	0.2009	+/-	0.0105	0.739	+/-	0.076	21.228	+/-	1.607	3.733	+/-	0.364	102.9	+/-	7.8	1.13	+/-	0.52		21.1779	0.57768
11-OV-ER-119	a	0.1389	400	0.25	0.2508	+/-	0.0132	15.245	+/-	0.783	41.726	+/-	2.201	60.247	+/-	2.519	162.5	+/-	8.4	103.69	+/-	4.37		94.4739	57.1673	181.38	+/-	5.50023
			850	0.25	0.1983	+/-	0.0108	11.455	+/-	0.613	33.868	+/-	2.043	57.239	+/-	2.645	166.4	+/-	10.3	77.69	+/-	3.34		94.2046	42.8327
			1150	0.2	0.0174	+/-	0.0075	0.032	+/-	0.038	2.236	+/-	1.326	1.833	+/-	2.314	125	+/-	91.2		n.d.
1 Computed by comparison to 20Ne signal in air standards. 1-sigma uncertainty includes measurement uncertainty of 20Ne signal in this analysis and the reproducibility of the air standards
2 Computed by comparison to 21Ne signal in air standards. 1-sigma uncertainty includes measurement uncertainty of 21Ne signal in this analysis and the reproducibility of the air standards
3 Computed by comparison to 22Ne signal in air standards. 1-sigma uncertainty includes measurement uncertainty of 22Ne signal in this analysis and the reproducibility of the air standards
4 Isotope ratio measured internally during each analysis and corrected for mass discrimination based on an air standard. Does not involve normalization to the Ne isotope signals in the standards, so the ratio computed from absolute Ne isotope amounts in previous columns may differ within uncertainty.

## Sheet: summary ratios
Sample	temp	N20	delN20	N21	delN21	N22	delN22	r2120	delr2120	r2220	delr2220	sample_num
17-OV-212-ERR	850	4.83268e+08	1.8858e+07	1.92462e+07	787064	6.78914e+07	2.84605e+06	0.039269	0.000921	0.1401	0.0041	212
17-OV-212-ERR	1100	7.93708e+07	9.01411e+06	376900	40084.7	6.64564e+06	1.16032e+06	0.004719	0.000687	0.0835	0.0168	212
17-OV-213-ERR	850	3.49075e+08	1.43115e+07	1.78161e+07	733553	5.33118e+07	2.38566e+06	0.05035	0.001359	0.1523	0.0054	213
17-OV-213-ERR	1100	3.22941e+07	1.02149e+07	148708	32217.5	2.65122e+06	1.13338e+06	0.004605	0.001766	0.082	0.0436	213
17-OV-214-ERR	850	2.09863e+09	6.99466e+07	2.47504e+07	1.01765e+06	2.30299e+08	8.51386e+06	0.011638	0.000142	0.1095	0.0009	214
17-OV-214-ERR	1100	6.72691e+08	2.31905e+07	3.64935e+06	171205	6.98842e+07	2.88471e+06	0.005401	0.000155	0.1036	0.0025	214
17-OV-215-ERR	850	2.32459e+08	1.10583e+07	1.64462e+07	622322	4.17661e+07	2.01284e+06	0.070684	0.002507	0.1806	0.0078	215
17-OV-215-ERR	1100	2.86043e+07	5.52207e+06	215361	33132.4	2.61083e+06	1.12429e+06	0.007527	0.001813	0.0921	0.0432	215
17-OV-217-ERR	850	3.3149e+08	1.3509e+07	2.4111e+07	863797	6.08373e+07	2.6979e+06	0.072653	0.001621	0.1844	0.0055	217
17-OV-217-ERR	1100	3.14215e+07	6.16572e+06	122129	28457.2	3.06863e+06	1.14066e+06	0.003886	0.001152	0.0985	0.041	217
17-OV-218-ERR	850	4.85478e+08	1.89794e+07	2.80328e+07	995259	7.9571e+07	3.47878e+06	0.057658	0.001057	0.1647	0.0043	218
17-OV-218-ERR	1100	6.11486e+07	6.43669e+06	245548	34567.4	5.60946e+06	1.18483e+06	0.003995	0.000661	0.0922	0.0211	218
11-OV-ER-117	400	162100000	9900000	22448000	1119000	42162000	2155000	0.137267	0.006922	0.2542	0.0149	117
11-OV-ER-117	850	243300000	11700000	5463000	302000	30335000	1926000	0.022249	0.0009	0.1215	0.0072	117
11-OV-ER-117	1150	28900000	9900000	131000	49000	4569000	1358000	0.004503	0.002272	0.1542	0.0693	117
11-OV-ER-118	400	763600000	30000000	21686000	1077000	96636000	4224000	0.028148	0.00052	0.1236	0.0029	118
11-OV-ER-118	850	1.0291e+09	38200000	12812000	659000	116724000	4895000	0.012337	0.000219	0.1105	0.002	118
11-OV-ER-118	1150	242900000	11500000	856000	84000	26299000	1818000	0.00349	0.000314	0.1055	0.0069	118
11-OV-ER-118	400	755000000	27800000	21545000	1050000	95807000	3974000	0.028412	0.0005	0.1234	0.0029	118
11-OV-ER-118	850	909500000	34300000	10349000	548000	100643000	4295000	0.011374	0.000205	0.1077	0.0023	118
11-OV-ER-118	1150	200900000	10500000	739000	76000	21228000	1607000	0.003733	0.000364	0.1029	0.0078	118
11-OV-ER-119	400	2.508e+08	13200000	15245000	783000	41726000	2201000	0.060247	0.002519	0.1625	0.0084	119
11-OV-ER-119	850	198300000	10800000	11455000	613000	33868000	2.043e+06	0.057239	0.002645	0.1664	0.0103	119
11-OV-ER-119	1150	17400000	7500000	32000	38000	2236000	1326000	0.001833	0.002314	0.125	0.0912	119

## Sheet: summary
Sept 2019 batch														Analyses of CRONUS-A run during these measurement periods
														(mean and SD of multiple aliquots)
sample_name	aliquot	aliquot_wt_g	analysis_date	N21xs_atoms_g	delN21xs_atoms_g	system	standard	std_N21c_atoms_g	std_delN21c_atoms_g	OK	analyst
17-OV-212-ERR	a	0.1487	2019-09-29	1.20768e+08	5.31612e+06	BGC-Ohio	CRONUS-A	3.20749e+08	6.07288e+06	OK	Greg Balco			320.749	6.07288
17-OV-213-ERR	a	0.1584	2019-09-29	1.0629e+08	4.6471e+06	BGC-Ohio	CRONUS-A	3.20749e+08	6.07288e+06	OK	Greg Balco
17-OV-214-ERR	a	0.1566	2019-09-29	1.28987e+08	6.73522e+06	BGC-Ohio	CRONUS-A	3.20749e+08	6.07288e+06	OK	Greg Balco
Nov 2019 batch
sample_name	aliquot	aliquot_wt_g	analysis_date	N21xs_atoms_g	delN21xs_atoms_g	system	standard	std_N21c_atoms_g	std_delN21c_atoms_g	OK	analyst
17-OV-215-ERR	a	0.1603	2019-11-11	9.91211e+07	3.89442e+06	BGC-Ohio	CRONUS-A	323000000	17000000	OK	Greg Balco			323	17
17-OV-217-ERR	a	0.1674	2019-11-11	1.38347e+08	5.16954e+06	BGC-Ohio	CRONUS-A	323000000	17000000	OK	Greg Balco
17-OV-218-ERR	a	0.1729	2019-11-11	1.54198e+08	5.76995e+06	BGC-Ohio	CRONUS-A	323000000	17000000	OK	Greg Balco
Aug 2015 batch
11-OV-ER-117	a	0.1286	2015-08-20	206240000	6.98508e+06	BGC-Ohio	CRONUS-A	313416000	8.96624e+06	OK	Greg Balco			313.416	8.96624
11-OV-ER-118	a	0.1517	2015-08-20	191700000	5.78294e+06	BGC-Ohio	CRONUS-A	313416000	8.96624e+06	OK	Greg Balco
11-OV-ER-118	b	0.1385	2015-08-20	195610000	5.79866e+06	BGC-Ohio	CRONUS-A	313416000	8.96624e+06	OK	Greg Balco
11-OV-ER-119	a	0.1389	2015-08-20	181380000	5.50023e+06	BGC-Ohio	CRONUS-A	313416000	8.96624e+06	OK	Greg Balco
